# Supplementary material for: Population structure of Nepali spring wheat (Triticum aestivum L.) germplasm
Source: PubMed Central journal article supplement (PMC7682013; doi:10.1186/s12870-020-02722-8), 2020-11-23
Supplement: 12870_2020_2722_MOESM1_ESM.pdf [file 12870_2020_2722_MOESM1_ESM.pdf]

**Manuscript title:**Population Structure of Nepali Spring Wheat (*Triticum aestivum* L.) Germplasm**Journal:**

BMC Plant Biology

**Authors:**\*Kamal Khadka<sup>1</sup>, Davoud Torkamaneh<sup>1,2,3</sup>, Mina Kaviani<sup>1</sup>, Francois Belzile<sup>2,3</sup>, Manish N. Raizada<sup>1</sup> and Alireza Navabi<sup>1</sup>**Affiliation:**\*<sup>1</sup> Department of Plant Agriculture, University of Guelph, Guelph, Ontario, Canada, N1G 2W1**Corresponding author email address:**[kamal.khadka011@gmail.com](mailto:kamal.khadka011@gmail.com)

**Additional file 1: Table S1:** List of the genotypes in Nepali Wheat Diversity Panel included in the study [Note: 1) A total of 49 landraces in red text indicate the authentic landraces identified in this study 2) *Rht* genes in specific trait (s) column correspond to presence *Rht1* and/or *Rht2* genes only]

| Entry | ID_Name    | Pedigree       | Seed source | Source/origin               | Specific trait(s)                               |
|-------|------------|----------------|-------------|-----------------------------|-------------------------------------------------|
| 1     | NGRC 00176 | Local landrace | NAGRC Nepal | Achham district, Nepal      | Awnless spike, no <i>Rht</i> genes              |
| 2     | NGRC 00177 | Local landrace | NAGRC Nepal | Achham district, Nepal      | Awnless spike, no <i>Rht</i> genes              |
| 3     | NGRC 00179 | Local landrace | NAGRC Nepal | Achham district, Nepal      | Awned spike, no <i>Rht</i> genes                |
| 4     | NGRC 00180 | Local landrace | NAGRC Nepal | Achham district, Nepal      | Waxy leaves, awnless spike, no <i>Rht</i> genes |
| 5     | NGRC 00181 | Local landrace | NAGRC Nepal | Bajura district, Nepal      | Awnless spike, no <i>Rht</i> genes              |
| 6     | NGRC 00199 | Local landrace | NAGRC Nepal | Gulmi district, Nepal       | Awnless spike, no <i>Rht</i> genes              |
| 7     | NGRC 00202 | Local landrace | NAGRC Nepal | Baitadi district, Nepal     | Awned spike, no <i>Rht</i> genes                |
| 8     | NGRC 00204 | Local landrace | NAGRC Nepal | Dandeldhura district, Nepal | Awnless spike, no <i>Rht</i> genes              |

|    |            |                |             |                             |                                                 |
|----|------------|----------------|-------------|-----------------------------|-------------------------------------------------|
| 9  | NGRC 00205 | Local landrace | NAGRC Nepal | Dandeldhura district, Nepal | Awnless spike, no <i>Rht</i> genes              |
| 10 | NGRC 02448 | Local landrace | NAGRC Nepal | Dandeldhura district, Nepal | Awnless spike, no <i>Rht</i> genes              |
| 11 | NGRC 02449 | Local landrace | NAGRC Nepal | Baglung district, Nepal     | Awnless spike, waxy leaves, no <i>Rht</i> genes |
| 12 | NGRC 02450 | Local landrace | NAGRC Nepal | Baglung district, Nepal     | Awned spike, <i>Rht2</i> gene                   |
| 13 | NGRC 02451 | Local landrace | NAGRC Nepal | Gorkha district, Nepal      | Awned spike, waxy leaves, <i>Rht2</i> gene      |
| 14 | NGRC 02452 | Local landrace | NAGRC Nepal | Solukhumbu district, Nepal  | Awnless spike, no <i>Rht</i> genes              |
| 15 | NGRC 02455 | Local landrace | NAGRC Nepal | Solukhumbu district, Nepal  | Awnless spike, waxy leaves, no <i>Rht</i> genes |
| 16 | NGRC 02456 | Local landrace | NAGRC Nepal | Khotang district, Nepal     | Awned spike, no <i>Rht</i> genes                |
| 17 | NGRC 02457 | Local landrace | NAGRC Nepal | Baglung district, Nepal     | Awned spike, waxy leaves, <i>Rht2</i> gene      |
| 18 | NGRC 02458 | Local landrace | NAGRC Nepal | Myagdi district, Nepal      | Awned spike, waxy leaves, no <i>Rht</i> genes   |
| 19 | NGRC 02459 | Local landrace | NAGRC Nepal | Mustang district, Nepal     | Awned spike, waxy leaves, <i>Rht2</i> gene      |
| 20 | NGRC 02460 | Local landrace | NAGRC Nepal | Manang district, Nepal      | Awnless spike, no <i>Rht</i> genes              |
| 21 | NGRC 02461 | Local landrace | NAGRC Nepal | Manang district, Nepal      | Awned spike, waxy leaves, no <i>Rht</i> genes   |
| 22 | NGRC 02462 | Local landrace | NAGRC Nepal | Manang district, Nepal      | Awnless spike, waxy leaves, no <i>Rht</i> genes |

|    |            |                |             |                             |                                                 |
|----|------------|----------------|-------------|-----------------------------|-------------------------------------------------|
| 23 | NGRC 02465 | Local landrace | NAGRC Nepal | Mugu district, Nepal        | Awnless spike, no <i>Rht</i> genes              |
| 24 | NGRC 02466 | Local landrace | NAGRC Nepal | Mugu district, Nepal        | Awnless spike, no <i>Rht</i> genes              |
| 25 | NGRC 02467 | Local landrace | NAGRC Nepal | Kalikot district, Nepal     | Awnless spike, no <i>Rht</i> genes              |
| 26 | NGRC 02470 | Local landrace | NAGRC Nepal | Dandeldhura district, Nepal | Awnless spike, no <i>Rht</i> genes              |
| 27 | NGRC 02471 | Local landrace | NAGRC Nepal | Jumla district, Nepal       | Awnless spike, no <i>Rht</i> genes              |
| 28 | NGRC 02472 | Local landrace | NAGRC Nepal | Darchula district, Nepal    | Awned spike, waxy leaves, <i>Rht2</i> gene      |
| 29 | NGRC 02496 | Local landrace | NAGRC Nepal | Darchula district, Nepal    | Awnless spike, no <i>Rht</i> genes              |
| 30 | NGRC 02544 | Local landrace | NAGRC Nepal | Rolpa district, Nepal       | Awnless spike, waxy leaves, no <i>Rht</i> genes |
| 31 | NGRC 02546 | Local landrace | NAGRC Nepal | Sallyan district, Nepal     | Awnless spike, waxy leaves, <i>Rht1</i> gene    |
| 32 | NGRC 02547 | Local landrace | NAGRC Nepal | Rukum district, Nepal       | Awnless spike, no <i>Rht</i> genes              |
| 33 | NGRC 02548 | Local landrace | NAGRC Nepal | Sallyan district, Nepal     | Awnless spike, no <i>Rht</i> genes              |
| 34 | NGRC 02549 | Local landrace | NAGRC Nepal | Rukum district, Nepal       | Awnless spike, no <i>Rht</i> genes              |
| 35 | NGRC 02550 | Local landrace | NAGRC Nepal | Sallyan district, Nepal     | Awned spike, waxy leaves, <i>Rht2</i> gene      |
| 36 | NGRC 02551 | Local landrace | NAGRC Nepal | Sallyan district, Nepal     | Awnless spike, no <i>Rht</i> genes              |

|    |            |                |             |                          |                                                 |
|----|------------|----------------|-------------|--------------------------|-------------------------------------------------|
| 37 | NGRC 02552 | Local landrace | NAGRC Nepal | Sallyan district, Nepal  | Awnless spike, no <i>Rht</i> genes              |
| 38 | NGRC 02553 | Local landrace | NAGRC Nepal | Rukum district, Nepal    | Awnless spike, no <i>Rht</i> genes              |
| 39 | NGRC 02554 | Local landrace | NAGRC Nepal | Bajhang district, Nepal  | Awned spike, waxy leaves, <i>Rht2</i> gene      |
| 40 | NGRC 02556 | Local landrace | NAGRC Nepal | Mustang district, Nepal  | Awnless spike, no <i>Rht</i> genes              |
| 41 | NGRC 02557 | Local landrace | NAGRC Nepal | Mustang district, Nepal  | Awnless spike, no <i>Rht</i> genes              |
| 42 | NGRC 02558 | Local landrace | NAGRC Nepal | Mustang district, Nepal  | Awnless spike, no <i>Rht</i> genes              |
| 43 | NGRC 02559 | Local landrace | NAGRC Nepal | Mustang district, Nepal  | Awnless spike, no <i>Rht</i> genes              |
| 44 | NGRC 02560 | Local landrace | NAGRC Nepal | Baglung district, Nepal  | Awnless spike, no <i>Rht</i> genes              |
| 45 | NGRC 02561 | Local landrace | NAGRC Nepal | Baitadi district, Nepal  | Awnless spike, waxy leaves, no <i>Rht</i> genes |
| 46 | NGRC 02563 | Local landrace | NAGRC Nepal | Darchula district, Nepal | Awned spike, waxy leaves, <i>Rht1</i> gene      |
| 47 | NGRC 02564 | Local landrace | NAGRC Nepal | Darchula district, Nepal | Awned spike, waxy leaves, <i>Rht1</i> gene      |
| 48 | NGRC 02565 | Local landrace | NAGRC Nepal | Bajura district, Nepal   | Awnless spike, no <i>Rht</i> genes              |
| 49 | NGRC 02566 | Local landrace | NAGRC Nepal | Bajura district, Nepal   | Awned spike, no <i>Rht</i> genes                |
| 50 | NGRC 02567 | Local landrace | NAGRC Nepal | Bajura district, Nepal   | Awned spike, no <i>Rht</i> genes                |

|    |            |                |             |                             |                                                 |
|----|------------|----------------|-------------|-----------------------------|-------------------------------------------------|
| 51 | NGRC 02568 | Local landrace | NAGRC Nepal | Bajura district, Nepal      | Awned spike, no <i>Rht</i> genes                |
| 52 | NGRC 02569 | Local landrace | NAGRC Nepal | Bajura district, Nepal      | Awned spike, no <i>Rht</i> genes                |
| 53 | NGRC 02570 | Local landrace | NAGRC Nepal | Bajhang district, Nepal     | Awnless spike, no <i>Rht</i> genes              |
| 54 | NGRC 02571 | Local landrace | NAGRC Nepal | Bajhang district, Nepal     | Awnless spike, no <i>Rht</i> genes              |
| 55 | NGRC 02572 | Local landrace | NAGRC Nepal | Bajhang district, Nepal     | Awnless spike, no <i>Rht</i> genes              |
| 56 | NGRC 02574 | Local landrace | NAGRC Nepal | Jajarkot district, Nepal    | Awnless spike, no <i>Rht</i> genes              |
| 57 | NGRC 02575 | Local landrace | NAGRC Nepal | Dandeldhura district, Nepal | Awnless spike, no <i>Rht</i> genes              |
| 58 | NGRC 02576 | Local landrace | NAGRC Nepal | Dandeldhura district, Nepal | Awnless spike, waxy leaves, no <i>Rht</i> genes |
| 59 | NGRC 02578 | Local landrace | NAGRC Nepal | Dandeldhura district, Nepal | Awned spike, no <i>Rht</i> genes                |
| 60 | NGRC 02579 | Local landrace | NAGRC Nepal | Dandeldhura district, Nepal | Awnless spike, no <i>Rht</i> genes              |
| 61 | NGRC 02580 | Local landrace | NAGRC Nepal | Dandeldhura district, Nepal | Awnless spike, no <i>Rht</i> genes              |
| 62 | NGRC 02581 | Local landrace | NAGRC Nepal | Dandeldhura district, Nepal | Awnless spike, no <i>Rht</i> genes              |
| 63 | NGRC 02582 | Local landrace | NAGRC Nepal | Dandeldhura district, Nepal | Awnless spike, no <i>Rht</i> genes              |
| 64 | NGRC 02584 | Local landrace | NAGRC Nepal | Taplejung district, Nepal   | Awned spike, waxy leaves, <i>Rht2</i> gene      |

|    |            |                |             |                             |                                                            |
|----|------------|----------------|-------------|-----------------------------|------------------------------------------------------------|
| 65 | NGRC 02585 | Local landrace | NAGRC Nepal | Doti district, Nepal        | Awned spike, waxy leaves, <i>Rht1</i> gene                 |
| 66 | NGRC 02586 | Local landrace | NAGRC Nepal | Baitadi district, Nepal     | Awnless spike, no <i>Rht</i> genes                         |
| 67 | NGRC 02587 | Local landrace | NAGRC Nepal | Baitadi district, Nepal     | Awned spike, waxy leaves, <i>Rht1</i> and <i>Rht2</i> gene |
| 68 | NGRC 02589 | Local landrace | NAGRC Nepal | Baitadi district, Nepal     | Awned spike, waxy leaves, <i>Rht1</i> gene                 |
| 69 | NGRC 02590 | Local landrace | NAGRC Nepal | Baitadi district, Nepal     | Awnless spike, no <i>Rht</i> genes                         |
| 70 | NGRC 02591 | Local landrace | NAGRC Nepal | Darchula district, Nepal    | Awnless spike, no <i>Rht</i> genes                         |
| 71 | NGRC 02593 | Local landrace | NAGRC Nepal | Dandeldhura district, Nepal | Awnless spike, waxy leaves, no <i>Rht</i> genes            |
| 72 | NGRC 02594 | Local landrace | NAGRC Nepal | Dandeldhura district, Nepal | Awnless spike, no <i>Rht</i> genes                         |
| 73 | NGRC 02595 | Local landrace | NAGRC Nepal | Doti district, Nepal        | Awnless spike, waxy leaves, no <i>Rht</i> gene             |
| 74 | NGRC 02596 | Local landrace | NAGRC Nepal | Doti district, Nepal        | Awned spike, waxy leaves, <i>Rht1</i> gene                 |
| 75 | NGRC 02599 | Local landrace | NAGRC Nepal | Dolakha district, Nepal     | Awnless spike, no <i>Rht</i> genes                         |
| 76 | NGRC 02602 | Local landrace | NAGRC Nepal | Kanchanpur district, Nepal  | Awned spike, waxy leaves, <i>Rht1</i> gene                 |
| 77 | NGRC 02603 | Local landrace | NAGRC Nepal | Doti district, Nepal        | Awnless spike, no <i>Rht</i> genes                         |

|    |            |                |             |                            |                                               |
|----|------------|----------------|-------------|----------------------------|-----------------------------------------------|
| 78 | NGRC 02604 | Local landrace | NAGRC Nepal | Dadeldhura district, Nepal | Awnless spike, no <i>Rht</i> genes            |
| 79 | NGRC 02605 | Local landrace | NAGRC Nepal | Baitadi district, Nepal    | Awnless spike, no <i>Rht</i> genes            |
| 80 | NGRC 02606 | Local landrace | NAGRC Nepal | Baitadi district, Nepal    | Awnless spike, no <i>Rht</i> genes            |
| 81 | NGRC 02607 | Local landrace | NAGRC Nepal | Baitadi district, Nepal    | Awnless spike, no <i>Rht</i> genes            |
| 82 | NGRC 02608 | Local landrace | NAGRC Nepal | Dadeldhura district, Nepal | Awnless spike, <i>Rht1</i> gene               |
| 83 | NGRC 02609 | Local landrace | NAGRC Nepal | Baitadi district, Nepal    | Awnless spike, no <i>Rht</i> genes            |
| 84 | NGRC 02610 | Local landrace | NAGRC Nepal | Dolkha district, Nepal     | Awned spike, waxy leaves, no <i>Rht</i> genes |
| 85 | NGRC 02611 | Local landrace | NAGRC Nepal | Dolkha district, Nepal     | Awnless spike, no <i>Rht</i> genes            |
| 86 | NGRC 02612 | Local landrace | NAGRC Nepal | Dolkha district, Nepal     | Awnless spike, no <i>Rht</i> genes            |
| 87 | NGRC 02613 | Local landrace | NAGRC Nepal | Dolkha district, Nepal     | Awnless spike, no <i>Rht</i> genes            |
| 88 | NGRC 02614 | Local landrace | NAGRC Nepal | Dolkha district, Nepal     | Awnless spike, no <i>Rht</i> genes            |
| 89 | NGRC 02615 | Local landrace | NAGRC Nepal | Dolkha district, Nepal     | Awnless spike, no <i>Rht</i> genes            |
| 90 | NGRC 02617 | Local landrace | NAGRC Nepal | Dolkha district, Nepal     | Awnless spike, no <i>Rht</i> genes            |
| 91 | NGRC 02619 | Local landrace | NAGRC Nepal | Dolkha district, Nepal     | Awned spike, no <i>Rht</i> genes              |

|     |            |                |             |                           |                                                 |
|-----|------------|----------------|-------------|---------------------------|-------------------------------------------------|
| 92  | NGRC 02620 | Local landrace | NAGRC Nepal | Dolkha district, Nepal    | Awnless spike, no <i>Rht</i> genes              |
| 93  | NGRC 02621 | Local landrace | NAGRC Nepal | Rasuwa district, Nepal    | Awned spike, <i>Rht2</i> gene                   |
| 94  | NGRC 02622 | Local landrace | NAGRC Nepal | Dolkha district, Nepal    | Awnless spike, waxy leaves, no <i>Rht</i> genes |
| 95  | NGRC 02623 | Local landrace | NAGRC Nepal | Dolkha district, Nepal    | Awnless spike, no <i>Rht</i> genes              |
| 96  | NGRC 02624 | Local landrace | NAGRC Nepal | Dolpa district, Nepal     | Awnless spike, no <i>Rht</i> genes              |
| 97  | NGRC 02625 | Local landrace | NAGRC Nepal | Dolkha district, Nepal    | Awnless spike, no <i>Rht</i> genes              |
| 98  | NGRC 02629 | Local landrace | NAGRC Nepal | Dolkha district, Nepal    | Awned spike, no <i>Rht</i> genes                |
| 99  | NGRC 02630 | Local landrace | NAGRC Nepal | Dolkha district, Nepal    | Awnless spike, no <i>Rht</i> genes              |
| 100 | NGRC 02631 | Local landrace | NAGRC Nepal | Rasuwa district, Nepal    | Awned spike, waxy leaves, no <i>Rht</i> genes   |
| 101 | NGRC 02632 | Local landrace | NAGRC Nepal | Nuwakot district, Nepal   | Awned spike, waxy leaves, no <i>Rht</i> genes   |
| 102 | NGRC 02633 | Local landrace | NAGRC Nepal | Nuwakot district, Nepal   | Awned spike, <i>Rht2</i> gene                   |
| 103 | NGRC 04399 | Local landrace | NAGRC Nepal | Ramechhap district, Nepal | Awnless spike, no <i>Rht</i> genes              |
| 104 | NGRC 04400 | Local landrace | NAGRC Nepal | Ramechhap district, Nepal | Awned spike, waxy leaves, <i>Rht1</i> gene      |
| 105 | NGRC 04401 | Local landrace | NAGRC Nepal | Ramechhap district, Nepal | Awned spike, waxy leaves, <i>Rht1</i> gene      |



|     |            |                |             |                               |                                                 |
|-----|------------|----------------|-------------|-------------------------------|-------------------------------------------------|
| 106 | NGRC 04402 | Local landrace | NAGRC Nepal | Ramechhap district, Nepal     | Awnless spike, no <i>Rht</i> genes              |
| 107 | NGRC 04404 | Local landrace | NAGRC Nepal | Ramechhap district, Nepal     | Awned spike, <i>Rht2</i> gene                   |
| 108 | NGRC 04405 | Local landrace | NAGRC Nepal | Ramechhap district, Nepal     | Awnless spike, waxy leaves, no <i>Rht</i> genes |
| 109 | NGRC 04406 | Local landrace | NAGRC Nepal | Ramechhap district, Nepal     | Awnless spike, no <i>Rht</i> gene               |
| 110 | NGRC 04408 | Local landrace | NAGRC Nepal | Ramechhap district, Nepal     | Awnless spike, no <i>Rht</i> genes              |
| 111 | NGRC 04409 | Local landrace | NAGRC Nepal | Salyan district, Nepal        | Awnless spike, no <i>Rht</i> genes              |
| 112 | NGRC 04410 | Local landrace | NAGRC Nepal | Myagdi district, Nepal        | Awned spike, no <i>Rht</i> genes                |
| 113 | NGRC 04413 | Local landrace | NAGRC Nepal | Kavreplanchok district, Nepal | Awnless spike, no <i>Rht</i> genes              |
| 114 | NGRC 04414 | Local landrace | NAGRC Nepal | Kavreplanchok district, Nepal | Awned spike, waxy leaves, <i>Rht1</i> gene      |
| 115 | NGRC 04416 | Local landrace | NAGRC Nepal | Salyan district, Nepal        | Awnless spike, no <i>Rht</i> genes              |
| 116 | NGRC 04417 | Local landrace | NAGRC Nepal | Salyan district, Nepal        | Awnless spike, no <i>Rht</i> genes              |
| 117 | NGRC 04418 | Local landrace | NAGRC Nepal | Salyan district, Nepal        | Awnless spike, waxy leaves, no <i>Rht</i> genes |
| 118 | NGRC 04419 | Local landrace | NAGRC Nepal | Salyan district, Nepal        | Awnless spike, waxy leaves, no <i>Rht</i> genes |
| 119 | NGRC 04421 | Local landrace | NAGRC Nepal | Salyan district, Nepal        | Awnless spike, no <i>Rht</i> genes              |

|     |            |                |             |                           |                                                 |
|-----|------------|----------------|-------------|---------------------------|-------------------------------------------------|
| 120 | NGRC 04422 | Local landrace | NAGRC Nepal | Surkhet district, Nepal   | Awnless spike, waxy leaves, no <i>Rht</i> genes |
| 121 | NGRC 04423 | Local landrace | NAGRC Nepal | Surkhet district, Nepal   | Awnless spike, waxy leaves, no <i>Rht</i> genes |
| 122 | NGRC 04424 | Local landrace | NAGRC Nepal | Ramechhap district, Nepal | Awnless spike, waxy leaves, no <i>Rht</i> genes |
| 123 | NGRC 04425 | Local landrace | NAGRC Nepal | Surkhet district, Nepal   | Awnless spike, waxy leaves, no <i>Rht</i> genes |
| 124 | NGRC 04426 | Local landrace | NAGRC Nepal | Surkhet district, Nepal   | Awnless spike, waxy leaves, no <i>Rht</i> genes |
| 125 | NGRC 04427 | Local landrace | NAGRC Nepal | Surkhet district, Nepal   | Awned spike, <i>Rht2</i> gene                   |
| 126 | NGRC 04428 | Local landrace | NAGRC Nepal | Dolakha district, Nepal   | Awnless spike, no <i>Rht</i> genes              |
| 127 | NGRC 04429 | Local landrace | NAGRC Nepal | Dolakha district, Nepal   | Awnless spike, no <i>Rht</i> genes              |
| 128 | NGRC 04430 | Local landrace | NAGRC Nepal | Dolakha district, Nepal   | Awnless spike, no <i>Rht</i> genes              |
| 129 | NGRC 04431 | Local landrace | NAGRC Nepal | Dolakha district, Nepal   | Awnless spike, no <i>Rht</i> genes              |
| 130 | NGRC 04432 | Local landrace | NAGRC Nepal | Dolakha district, Nepal   | Awnless spike, no <i>Rht</i> genes              |
| 131 | NGRC 04433 | Local landrace | NAGRC Nepal | Dolakha district, Nepal   | Awnless spike, no <i>Rht</i> genes              |
| 132 | NGRC 04434 | Local landrace | NAGRC Nepal | Dolakha district, Nepal   | Awnless spike, no <i>Rht</i> genes              |
| 133 | NGRC 04436 | Local landrace | NAGRC Nepal | Dolakha district, Nepal   | Awned spike, no <i>Rht</i> genes                |

|     |            |                |             |                               |                                                  |
|-----|------------|----------------|-------------|-------------------------------|--------------------------------------------------|
| 134 | NGRC 04437 | Local landrace | NAGRC Nepal | Dolakha district, Nepal       | Awned spike, waxy leaves, <i>Rht1</i> gene       |
| 135 | NGRC 04439 | Local landrace | NAGRC Nepal | Dolakha district, Nepal       | Awnless spike, waxy leaves, no <i>Rht</i> genes  |
| 136 | NGRC 04440 | Local landrace | NAGRC Nepal | Dolakha district, Nepal       | Awnless spike, waxy leaves, no <i>Rht</i> genes  |
| 137 | NGRC 04443 | Local landrace | NAGRC Nepal | Kavreplanchok district, Nepal | Awnless spike, <i>Rht1</i> and <i>Rht2</i> genes |
| 138 | NGRC 04444 | Local landrace | NAGRC Nepal | Kavreplanchok district, Nepal | Awnless spike, no <i>Rht</i> genes               |
| 139 | NGRC 04445 | Local landrace | NAGRC Nepal | Kavreplanchok district, Nepal | Awnless spike, no <i>Rht</i> genes               |
| 140 | NGRC 04446 | Local landrace | NAGRC Nepal | Kavreplanchok district, Nepal | Awned spike, no <i>Rht</i> genes                 |
| 141 | NGRC 04447 | Local landrace | NAGRC Nepal | Kavreplanchok district, Nepal | Awned spike, waxy leaves, <i>Rht1</i> gene       |
| 142 | NGRC 04448 | Local landrace | NAGRC Nepal | Surkhet district, Nepal       | Awnless spike, no <i>Rht</i> genes               |
| 143 | NGRC 04449 | Local landrace | NAGRC Nepal | Surkhet district, Nepal       | Awned spike, waxy leaves, <i>Rht1</i> gene       |
| 144 | NGRC 04450 | Local landrace | NAGRC Nepal | Surkhet district, Nepal       | Awnless spike, waxy leaves                       |
| 145 | NGRC 04451 | Local landrace | NAGRC Nepal | Dailekh district, Nepal       | Awnless spike, no <i>Rht</i> genes               |
| 146 | NGRC 04452 | Local landrace | NAGRC Nepal | Dailekh district, Nepal       | Awnless spike, no <i>Rht</i> genes               |
| 147 | NGRC 04453 | Local landrace | NAGRC Nepal | Dailekh district, Nepal       | Awnless spike, no <i>Rht</i> genes               |

|     |            |                |             |                         |                                               |
|-----|------------|----------------|-------------|-------------------------|-----------------------------------------------|
| 148 | NGRC 04454 | Local landrace | NAGRC Nepal | Dailekh district, Nepal | Awnless spike, no <i>Rht</i> genes            |
| 149 | NGRC 04455 | Local landrace | NAGRC Nepal | Dailekh district, Nepal | Awnless spike, no <i>Rht</i> genes            |
| 150 | NGRC 04456 | Local landrace | NAGRC Nepal | Dailekh district, Nepal | Awned spike, waxy leaves, <i>Rht1</i> gene    |
| 151 | NGRC 04457 | Local landrace | NAGRC Nepal | Dailekh district, Nepal | Awnless spike, no <i>Rht</i> genes            |
| 152 | NGRC 04458 | Local landrace | NAGRC Nepal | Dailekh district, Nepal | Awned spike, waxy leaves, no <i>Rht1</i> gene |
| 153 | NGRC 04459 | Local landrace | NAGRC Nepal | Dailekh district, Nepal | Awnless spike, no <i>Rht</i> genes            |
| 154 | NGRC 04460 | Local landrace | NAGRC Nepal | Dailekh district, Nepal | Awnless spike, no <i>Rht</i> genes            |
| 155 | NGRC 04461 | Local landrace | NAGRC Nepal | Dailekh district, Nepal | Awnless spike, no <i>Rht</i> genes            |
| 156 | NGRC 04462 | Local landrace | NAGRC Nepal | Dailekh district, Nepal | Awnless spike, no <i>Rht</i> genes            |
| 157 | NGRC 04463 | Local landrace | NAGRC Nepal | Dailekh district, Nepal | Awned spike, no <i>Rht</i> genes              |
| 158 | NGRC 04464 | Local landrace | NAGRC Nepal | Dailekh district, Nepal | Awnless spike, no <i>Rht</i> genes            |
| 159 | NGRC 04465 | Local landrace | NAGRC Nepal | Dailekh district, Nepal | Awnless spike, no <i>Rht</i> genes            |
| 160 | NGRC 04466 | Local landrace | NAGRC Nepal | Dailekh district, Nepal | Awnless spike, <i>Rht2</i> gene               |
| 161 | NGRC 04467 | Local landrace | NAGRC Nepal | Dailekh district, Nepal | Awnless spike, no <i>Rht</i> genes            |

|     |            |                              |                               |                         |                                           |
|-----|------------|------------------------------|-------------------------------|-------------------------|-------------------------------------------|
| 162 | NGRC 04468 | Local landrace               | NAGRC Nepal                   | Dailekh district, Nepal | Awnless spike, no <i>Rht</i> genes        |
| 163 | NGRC 04470 | Local landrace               | NAGRC Nepal                   | Dailekh district, Nepal | Awnless spike, no <i>Rht</i> genes        |
| 164 | NGRC 04471 | Local landrace               | NAGRC Nepal                   | Dailekh district, Nepal | Awnless spike, no <i>Rht</i> genes        |
| 165 | NGRC 04472 | Local landrace               | NAGRC Nepal                   | Dailekh district, Nepal | Awnless spike, no <i>Rht</i> genes        |
| 166 | NGRC 04473 | Local landrace               | NAGRC Nepal                   | Dailekh district, Nepal | Awnless spike, no <i>Rht</i> genes        |
| 167 | NGRC 04474 | Local landrace               | NAGRC Nepal                   | Mugu district, Nepal    | Awnless spike, no <i>Rht</i> genes        |
| 168 | Lerma 52   | MENTANA/KENYA 324            | NWRP Nepal (Released variety) | Mexico                  | Semi-dwarf, awned spike, <i>Rht1</i> gene |
| 169 | Kalyansona | PJ"S"/GB55 (S227)            | NWRP Nepal (Released variety) | Mexico                  | Semi-dwarf, awned spike, <i>Rht1</i> gene |
| 170 | Pitic 62   | YT54/N10B126.IC              | NWRP Nepal (Released variety) | Mexico                  | Semi-dwarf, awned spike, <i>Rht2</i> gene |
| 171 | RR21       | 1154-388/AN/3/YT54/NIOB/RL64 | NWRP Nepal (Released variety) | Mexico                  | Semi-dwarf, awned spike, <i>Rht2</i> gene |
| 172 | NL 30      | HD832-5-5-OY/RB              | NWRP Nepal (Released variety) | India                   | Semi-dwarf, awned spike, <i>Rht2</i> gene |
| 173 | UP 262     | S308/BAJIO-66                | NWRP Nepal (Released variety) | India                   | Semi-dwarf, awned spike, <i>Rht2</i> gene |
| 174 | Lumbini    | E4871/PJ62                   | NWRP Nepal (Released variety) | India                   | Semi-dwarf, awned spike, <i>Rht1</i> gene |
| 175 | Tribeni    | HD1963/HD1931                | NWRP Nepal (Released variety) | India                   | Semi-dwarf, awned spike, <i>Rht1</i> gene |
| 176 | Vinayak    | LC55                         | NWRP Nepal (Released variety) | India                   | Semi-dwarf, awned spike, <i>Rht2</i> gene |

|     |              |                               |                               |        |                                                                               |
|-----|--------------|-------------------------------|-------------------------------|--------|-------------------------------------------------------------------------------|
| 177 | Siddhartha   | HD2092/HD1982//E4870/K65      | NWRP Nepal (Released variety) | India  | Awned spike, no <i>Rht</i> genes                                              |
| 178 | Vaskar       | TZPP/PL//7C                   | NWRP Nepal (Released variety) | Mexico | Semi-dwarf, awned spike, <i>Rht1</i> gene                                     |
| 179 | Nepal 297    | HD2173/HD2186//HD2160         | NWRP Nepal (Released variety) | India  | Semi-dwarf, awned spike, <i>Rht1</i> gene                                     |
| 180 | NL 251       | WH147/HD2160//WH147           | NWRP Nepal (Released variety) | India  | Semi-dwarf, awned spike, <i>Rht2</i> gene                                     |
| 181 | Annapurna 1  | KBZ/BUHO//KAL/BB=(VEE"S")     | NWRP Nepal (Released variety) | Mexico | Dense and awned spike, amber grain, <i>Rht1</i> gene                          |
| 182 | Annapurna 2  | NPO/TOB"S"//8156/3/KAL/BB     | NWRP Nepal (Released variety) | India  | Semi-dwarf, awned spike, <i>Rht1</i> gene                                     |
| 183 | Annapurna 3  | KBZ/BUHO//KAL/BB=(VEE"S")     | NWRP Nepal (Released variety) | Mexico | Semi-dwarf, awned spike, <i>Rht1</i> gene                                     |
| 184 | BL 1022      | PVN/BUC                       | NWRP Nepal (Released variety) | Mexico | Semi-dwarf, awned spike, <i>Rht1</i> gene                                     |
| 185 | Bhrikuti     | CMT/COC75/3/PLO//FURY/ANA75   | NWRP Nepal (Released variety) | Mexico | Semi-dwarf, awned spike, <i>Rht1</i> gene                                     |
| 186 | BL 1135      | QTZ/TAN"S"                    | NWRP Nepal (Released variety) | Nepal  | Semi-dwarf, awned spike, <i>Rht2</i> gene                                     |
| 187 | Annapurna 4  | KBZ/3/CC/INIA//CNO/ELGAU/SN64 | NWRP Nepal (Released variety) | Mexico | Awned spike, no <i>Rht</i> genes                                              |
| 188 | Achyut       | CPAN168/HD2204                | NWRP Nepal (Released variety) | India  | Semi-dwarf, lower plains and foot hills, awned spike, <i>Rht1</i> gene        |
| 189 | Rohini       | PRL"S"/TONI//CHIL"S"          | NWRP Nepal (Released variety) | Nepal  | Awned spike, no <i>Rht</i> genes                                              |
| 190 | Kanti        | LIRA/FUFAN17//VEE#5"S"        | NWRP Nepal (Released variety) | Mexico | Awned spike, no <i>Rht</i> genes                                              |
| 191 | Pasang Lhamu | PGO/SERI                      | NWRP Nepal (Released variety) | Mexico | Awned spike, semi erect leaves, bold grains, awned spike, no <i>Rht</i> genes |
| 192 | BL 1473      | NL297/NL352                   | NWRP Nepal (Released variety) | Nepal  | Semi-dwarf, spot blotch tolerant, awned spike, <i>Rht2</i> gene               |

|     |                      |                             |                               |                |                                                                                |
|-----|----------------------|-----------------------------|-------------------------------|----------------|--------------------------------------------------------------------------------|
| 193 | Gautam               | SIDDHARTH/NING8319/NL297    | NWRP Nepal (Released variety) | Nepal          | Semi-dwarf, high yielding, awned spike, <i>Rht2</i> gene                       |
| 194 | WK1204               | SW89-3064/STAR              | NWRP Nepal (Released variety) | Mexico         | Semi-erect waxy leaves, sturdy stem, awned and waxy spike, <i>Rht2</i> gene    |
| 195 | NL 971               | MRNG/BUC//BLO/PVN/3/PJB81   | NWRP Nepal (Released variety) | Mexico         | Semi-dwarf, high yielding, white grains awned spike, <i>Rht1</i> gene          |
| 196 | Aditya (BL 3264)     | GS348/NL746//NL748          | NWRP Nepal (Released variety) | Nepal          | White grain, high yielding, awned spike, <i>Rht2</i> gene                      |
| 197 | Vijay (BL 3063)      | NL 748/NL 736 (Ug99 Res.)   | NWRP Nepal (Released variety) | Nepal          | Semi-dwarf, terminal heat tolerance, awned spike, <i>Rht2</i> gene             |
| 198 | Gaura (BL 3235)      | NL 872/NL 868               | NWRP Nepal (Released variety) | Nepal          | Early, spot blotch resistant, high tillering, awned spike, no <i>Rht</i> genes |
| 199 | Dhaulagiri (BL 3503) | BL 1961/NL 867              | NWRP Nepal (Released variety) | Nepal          | Awned and waxy spike, erect leaves, <i>Rht2</i> gene                           |
| 200 | Danphe (NL 1064)     | KIRITATI//2*PBW65/2*SERI.1B | NWRP Nepal (Released variety) | Mexico         | Awned spike, waxy and droopy leaves, <i>Rht1</i> gene                          |
| 201 | Tilottama (NL 1073)  | WAXWING*2/VIVITSI           | NWRP Nepal (Released variety) | Mexico         | Early, stay green, spot blotch resistant, awned spike, <i>Rht1</i> gene        |
| 202 | BW30655              | PBW343                      | CIMMYT, Mexico (CIMMYT line)  | CIMMYT, Mexico | Semi-dwarf, awned spike, waxy leaves, <i>Rht1</i> gene                         |
| 203 | BW35623              | PRL/2*PASTOR                | CIMMYT, Mexico (CIMMYT line)  | CIMMYT, Mexico | Semi-dwarf, awned spike, waxy leaves, <i>Rht1</i> gene                         |
| 204 | BW43945              | MUNAL #1                    | CIMMYT, Mexico (CIMMYT line)  | CIMMYT, Mexico | Semi-dwarf, awned spike, waxy leaves, <i>Rht1</i> gene                         |

|     |         |                                                                         |                              |                |                                                        |
|-----|---------|-------------------------------------------------------------------------|------------------------------|----------------|--------------------------------------------------------|
| 205 | BW45161 | BECARD                                                                  | CIMMYT, Mexico (CIMMYT line) | CIMMYT, Mexico | Semi-dwarf, awned spike, waxy leaves, <i>Rht1</i> gene |
| 206 | BW43354 | SUPER 152                                                               | CIMMYT, Mexico (CIMMYT line) | CIMMYT, Mexico | Semi-dwarf, awned spike, waxy leaves, <i>Rht1</i> gene |
| 207 | BW44829 | PFUNYE #1                                                               | CIMMYT, Mexico (CIMMYT line) | CIMMYT, Mexico | Semi-dwarf, awned spike, waxy leaves, <i>Rht1</i> gene |
| 208 | BW44908 | HUHWA                                                                   | CIMMYT, Mexico (CIMMYT line) | CIMMYT, Mexico | Semi-dwarf, awned spike, waxy leaves, <i>Rht1</i> gene |
| 209 | BW45568 | TRCH*2/3/C80.1/3*QT4118//3*PASTOR                                       | CIMMYT, Mexico (CIMMYT line) | CIMMYT, Mexico | Semi-dwarf, awned spike, waxy leaves, <i>Rht1</i> gene |
| 210 | BW45152 | WHEAR//INQALAB 91*2/TUKURU                                              | CIMMYT, Mexico (CIMMYT line) | CIMMYT, Mexico | Awnless spike, waxy leaves, no <i>Rht</i> genes        |
| 211 | BW45573 | WHEAR/KRONSTAD F2004                                                    | CIMMYT, Mexico (CIMMYT line) | CIMMYT, Mexico | Awnless spike, waxy leaves, no <i>Rht</i> genes        |
| 212 | BW45173 | WHEAR/SOKOLL                                                            | CIMMYT, Mexico (CIMMYT line) | CIMMYT, Mexico | Semi-dwarf, awned spike, waxy leaves, <i>Rht1</i> gene |
| 213 | BW45578 | SHA7/VEE#5/5/VEE#8//JUP/BJY/3/F3.71/TRM/4/2*WEAVER/6/SKAUZ/PARUS//PARUS | CIMMYT, Mexico (CIMMYT line) | CIMMYT, Mexico | Semi-dwarf, awned spike, waxy leaves, <i>Rht1</i> gene |
| 214 | BW45590 | PFAU/SERI.1B//AMAD/3/INQALAB 91*2/KUKUNA/4/WBLL1*2/KURUKU               | CIMMYT, Mexico (CIMMYT line) | CIMMYT, Mexico | Semi-dwarf, awned spike, waxy leaves, <i>Rht1</i> gene |



|     |         |                                                                                     |                              |                |                                                        |
|-----|---------|-------------------------------------------------------------------------------------|------------------------------|----------------|--------------------------------------------------------|
| 215 | BW45592 | NELOKI                                                                              | CIMMYT, Mexico (CIMMYT line) | CIMMYT, Mexico | Semi-dwarf, awned spike, waxy leaves, <i>Rht1</i> gene |
| 216 | BW45593 | HUW234+LR34/PRINIA//INQALAB 91*2/KUKUNA/5/FRET2*2/4/SNI/TR AP#1/3/KAUZ*2/TRAP//KAUZ | CIMMYT, Mexico (CIMMYT line) | CIMMYT, Mexico | Semi-dwarf, awned spike, waxy leaves, <i>Rht1</i> gene |
| 217 | BW45587 | SNB//CMH79A.955/3*CNO79/3/ATTILA/4/CHEN/AEGILOPS SQUARROSA (TAUS)//BCN/3/2*KAUZ     | CIMMYT, Mexico (CIMMYT line) | CIMMYT, Mexico | Semi-dwarf, awned spike, waxy leaves, <i>Rht1</i> gene |
| 218 | BW45165 | KAUZ//ALTAR 84/AOS/3/PASTOR/4/MILAN/CUPE//S W89.3064/5/KIRITATI                     | CIMMYT, Mexico (CIMMYT line) | CIMMYT, Mexico | Semi-dwarf, awned spike, waxy leaves, <i>Rht1</i> gene |
| 219 | BW45595 | MELON//FILIN/MILAN/3/FILIN                                                          | CIMMYT, Mexico (CIMMYT line) | CIMMYT, Mexico | Semi-dwarf, awned spike, waxy leaves, <i>Rht1</i> gene |
| 220 | BW48132 | MARCHOUC*4/SAADA/3/2*FRET2 /KUKUNA//FRET2                                           | CIMMYT, Mexico (CIMMYT line) | CIMMYT, Mexico | Semi-dwarf, awned spike, waxy leaves, <i>Rht1</i> gene |
| 221 | BW48133 | WAXWING/6/PVN//CAR422/ANA/5/B OW/CROW//BUC/PVN/3/YR/4/TRAP# 1                       | CIMMYT, Mexico (CIMMYT line) | CIMMYT, Mexico | Semi-dwarf, awned spike, waxy leaves, <i>Rht1</i> gene |
| 222 | BW48135 | ATTILA*2//CHIL/BUC*2/3/KUKUNA                                                       | CIMMYT, Mexico (CIMMYT line) | CIMMYT, Mexico | Semi-dwarf, awned spike, waxy leaves, <i>Rht1</i> gene |
| 223 | BW48136 | WBLL1/KUKUNA//TACUPETO F2001/3/BAJ #1                                               | CIMMYT, Mexico (CIMMYT line) | CIMMYT, Mexico | Semi-dwarf, awned spike, waxy leaves, <i>Rht1</i> gene |

|     |         |                                                                                                  |                              |                |                                                        |
|-----|---------|--------------------------------------------------------------------------------------------------|------------------------------|----------------|--------------------------------------------------------|
| 224 | BW48137 | WBLL1//UP2338*2/VIVITSI                                                                          | CIMMYT, Mexico (CIMMYT line) | CIMMYT, Mexico | Semi-dwarf, awned spike, waxy leaves, <i>Rht1</i> gene |
| 225 | BW48139 | FRET2*2/4/SNI/TRAP#1/3/KAUZ*2/T RAP//KAUZ/5/PFAU/WEAVER//BRAMBLING                               | CIMMYT, Mexico (CIMMYT line) | CIMMYT, Mexico | Semi-dwarf, awned spike, waxy leaves, <i>Rht2</i> gene |
| 226 | BW48171 | TRCH//PRINIA/PASTOR                                                                              | CIMMYT, Mexico (CIMMYT line) | CIMMYT, Mexico | Semi-dwarf, awned spike, waxy leaves, <i>Rht1</i> gene |
| 227 | BW48140 | KAUZ//ALTAR 84/AOS/3/MILAN/KAUZ/4/SAUAL                                                          | CIMMYT, Mexico (CIMMYT line) | CIMMYT, Mexico | Semi-dwarf, awned spike, waxy leaves, <i>Rht1</i> gene |
| 228 | BW48141 | KACHU/SAUAL                                                                                      | CIMMYT, Mexico (CIMMYT line) | CIMMYT, Mexico | Semi-dwarf, awned spike, waxy leaves, <i>Rht1</i> gene |
| 229 | BW48144 | ATTILA/3*BCN//BAV92/3/TILHI/5/BAV92/3/PRL/SARA//TSI/VEE#5/4/CR OC_1/AE.SQUARROSA (224)//2*OPATA  | CIMMYT, Mexico (CIMMYT line) | CIMMYT, Mexico | Semi-dwarf, awned spike, waxy leaves, <i>Rht1</i> gene |
| 230 | BW48145 | ROLF07/YANAC//TACUPETO F2001/BRAMBLING                                                           | CIMMYT, Mexico (CIMMYT line) | CIMMYT, Mexico | Semi-dwarf, awned spike, waxy leaves, <i>Rht1</i> gene |
| 231 | BW48148 | FRET2*2/4/SNI/TRAP#1/3/KAUZ*2/T RAP//KAUZ*2/6/PVN//CAR422/ANA/5/BOW/CROW//BUC/PVN/3/YR/4/TR AP#1 | CIMMYT, Mexico (CIMMYT line) | CIMMYT, Mexico | Semi-dwarf, awned spike, waxy leaves, <i>Rht1</i> gene |
| 232 | BW48149 | FRET2*2/4/SNI/TRAP#1/3/KAUZ*2/T RAP//KAUZ/5/PARUS/6/FRET2*2/KU KUNA                              | CIMMYT, Mexico (CIMMYT line) | CIMMYT, Mexico | Semi-dwarf, awned spike, waxy leaves, <i>Rht1</i> gene |

|     |         |                                                                                                |                                 |                |                                                                               |
|-----|---------|------------------------------------------------------------------------------------------------|---------------------------------|----------------|-------------------------------------------------------------------------------|
| 233 | BW48150 | FRET2*2/4/SNI/TRAP#1/3/KAUZ*2/T<br>RAP//KAUZ/5/PARUS/6/FRET2*2/KU<br>KUNA                      | CIMMYT, Mexico (CIMMYT<br>line) | CIMMYT, Mexico | Semi-dwarf, awned<br>spike, waxy leaves, <i>Rht1</i><br>gene                  |
| 234 | BW48151 | FRET2*2/4/SNI/TRAP#1/3/KAUZ*2/T<br>RAP//KAUZ*2/5/KIRITATI                                      | CIMMYT, Mexico (CIMMYT<br>line) | CIMMYT, Mexico | Semi-dwarf, awned<br>spike, waxy leaves, <i>Rht1</i><br>gene                  |
| 235 | BW48154 | FRET2/KUKUNA//FRET2/3/PASTOR/<br>/HXL7573/2*BAU/5/FRET2*2/4/SNI/T<br>RAP#1/3/KAUZ*2/TRAP//KAUZ | CIMMYT, Mexico (CIMMYT<br>line) | CIMMYT, Mexico | Semi-dwarf, awned<br>spike, waxy leaves, <i>Rht1</i><br>gene                  |
| 236 | BW48155 | WBLL1*2/KUKUNA*2//WHEAR                                                                        | CIMMYT, Mexico (CIMMYT<br>line) | CIMMYT, Mexico | Semi-dwarf, awned<br>spike, waxy leaves, <i>Rht1</i><br>gene                  |
| 237 | BW48156 | TRCH/SRTU//KACHU                                                                               | CIMMYT, Mexico (CIMMYT<br>line) | CIMMYT, Mexico | Semi-dwarf, awned<br>spike, waxy leaves, <i>Rht1</i><br>gene                  |
| 238 | BW48158 | SERI.1B//KAUZ/HEVO/3/AMAD*2/4/<br>KIRITATI                                                     | CIMMYT, Mexico (CIMMYT<br>line) | CIMMYT, Mexico | Semi-dwarf, awned<br>spike, waxy leaves, <i>Rht1</i><br>gene                  |
| 239 | BW48172 | WAXWING*2/6/PVN//CAR422/ANA/<br>5/BOW/CROW//BUC/PVN/3/YR/4/TR<br>AP#1                          | CIMMYT, Mexico (CIMMYT<br>line) | CIMMYT, Mexico | Semi-dwarf, awned<br>spike, waxy leaves, <i>Rht1</i><br>gene                  |
| 240 | BW48174 | PBW343*2/KUKUNA//PARUS/3/PBW<br>343*2/KUKUNA                                                   | CIMMYT, Mexico (CIMMYT<br>line) | CIMMYT, Mexico | Semi-dwarf, awned<br>spike, waxy leaves, <i>Rht1</i><br>and <i>Rht2</i> genes |
| 241 | BW48161 | PBW343*2/KUKUNA//PARUS/3/PBW<br>343*2/KUKUNA                                                   | CIMMYT, Mexico (CIMMYT<br>line) | CIMMYT, Mexico | Semi-dwarf, awned<br>spike, waxy leaves, <i>Rht1</i><br>gene                  |

|     |         |                                                                                      |                              |                |                                                        |
|-----|---------|--------------------------------------------------------------------------------------|------------------------------|----------------|--------------------------------------------------------|
| 242 | BW48162 | PBW343*2/KUKUNA*2//YANAC                                                             | CIMMYT, Mexico (CIMMYT line) | CIMMYT, Mexico | Semi-dwarf, awned spike, waxy leaves, <i>Rht1</i> gene |
| 243 | BW48163 | PBW343*2/KUKUNA*2//YANAC                                                             | CIMMYT, Mexico (CIMMYT line) | CIMMYT, Mexico | Semi-dwarf, awned spike, waxy leaves, <i>Rht1</i> gene |
| 244 | BW48166 | PBW343*2/KUKUNA//SRTU/3/PBW343*2/KHVAKI                                              | CIMMYT, Mexico (CIMMYT line) | CIMMYT, Mexico | Semi-dwarf, awned spike, waxy leaves, <i>Rht1</i> gene |
| 245 | BW48165 | PBW343*2/KUKUNA//SRTU/3/PBW343*2/KHVAKI                                              | CIMMYT, Mexico (CIMMYT line) | CIMMYT, Mexico | Semi-dwarf, awned spike, waxy leaves, <i>Rht1</i> gene |
| 246 | BW48169 | ATTILA*2/PBW65/6/PVN//CAR422/ANA/5/BOW/CROW//BUC/PVN/3/YR/4/TRAP#1/7/ATTILA/2*PASTOR | CIMMYT, Mexico (CIMMYT line) | CIMMYT, Mexico | Semi-dwarf, awned spike, waxy leaves, <i>Rht1</i> gene |
| 247 | BW48168 | ATTILA*2/PBW65/6/PVN//CAR422/ANA/5/BOW/CROW//BUC/PVN/3/YR/4/TRAP#1/7/ATTILA/2*PASTOR | CIMMYT, Mexico (CIMMYT line) | CIMMYT, Mexico | Semi-dwarf, awned spike, waxy leaves, <i>Rht1</i> gene |
| 248 | BW49069 | ATTILA*2/PBW65*2//KACHU                                                              | CIMMYT, Mexico (CIMMYT line) | CIMMYT, Mexico | Semi-dwarf, awned spike, waxy leaves, <i>Rht1</i> gene |
| 249 | BW49227 | ATTILA*2/PBW65*2//KACHU                                                              | CIMMYT, Mexico (CIMMYT line) | CIMMYT, Mexico | Semi-dwarf, awned spike, waxy leaves, <i>Rht1</i> gene |
| 250 | BW49235 | REEDLING #1                                                                          | CIMMYT, Mexico (CIMMYT line) | CIMMYT, Mexico | Semi-dwarf, awned spike, waxy leaves, <i>Rht1</i> gene |

|     |         |                                                                      |                              |                |                                                        |
|-----|---------|----------------------------------------------------------------------|------------------------------|----------------|--------------------------------------------------------|
| 251 | BW49072 | KACHU #1/KIRITATI//KACHU                                             | CIMMYT, Mexico (CIMMYT line) | CIMMYT, Mexico | Semi-dwarf, awned spike, waxy leaves, <i>Rht1</i> gene |
| 252 | BW49075 | PBW343*2/KUKUNA*2//FRTL/PIFED                                        | CIMMYT, Mexico (CIMMYT line) | CIMMYT, Mexico | Semi-dwarf, awned spike, waxy leaves, <i>Rht1</i> gene |
| 253 | BW49077 | WBLL1*2/4/BABAX/LR42//BABAX/3/BABAX/LR42//BABAX                      | CIMMYT, Mexico (CIMMYT line) | CIMMYT, Mexico | Semi-dwarf, awned spike, waxy leaves, <i>Rht1</i> gene |
| 254 | BW49078 | ATTILA*2/PBW65*2//MURGA                                              | CIMMYT, Mexico (CIMMYT line) | CIMMYT, Mexico | Semi-dwarf, awned spike, waxy leaves, <i>Rht1</i> gene |
| 255 | BW49079 | ROLF07*2/5/REH/HARE//2*BCN/3/CROC_1/AE.SQUARROSA (213)//PGO/4/HUITES | CIMMYT, Mexico (CIMMYT line) | CIMMYT, Mexico | Semi-dwarf, awned spike, waxy leaves, <i>Rht1</i> gene |
| 256 | BW49082 | ROLF07*2/5/FCT/3/GOV/AZ//MUS/4/DOVE/BUC                              | CIMMYT, Mexico (CIMMYT line) | CIMMYT, Mexico | Semi-dwarf, awned spike, waxy leaves, <i>Rht1</i> gene |
| 257 | BW49344 | SAUAL/3/ACHTAR*3//KANZ/KS85-8-4/4/SAUAL                              | CIMMYT, Mexico (CIMMYT line) | CIMMYT, Mexico | Semi-dwarf, awned spike, waxy leaves, <i>Rht1</i> gene |
| 258 | BW49084 | FRNCLN/ROLF07                                                        | CIMMYT, Mexico (CIMMYT line) | CIMMYT, Mexico | Semi-dwarf, awned spike, waxy leaves, <i>Rht1</i> gene |
| 259 | BW49088 | QUAIU/5/FRET2*2/4/SNI/TRAP#1/3/KAUZ*2/TRAP//KAUZ                     | CIMMYT, Mexico (CIMMYT line) | CIMMYT, Mexico | Semi-dwarf, awned spike, waxy leaves, <i>Rht1</i> gene |
| 260 | BW49089 | TACUPETO F2001*2/BRAMBLING//WBLL1*2/BRAMBLING                        | CIMMYT, Mexico (CIMMYT line) | CIMMYT, Mexico | Semi-dwarf, awned spike, waxy leaves, <i>Rht1</i> gene |

|     |         |                                                                         |                              |                |                                                        |
|-----|---------|-------------------------------------------------------------------------|------------------------------|----------------|--------------------------------------------------------|
| 261 | BW49391 | BECARD/KACHU                                                            | CIMMYT, Mexico (CIMMYT line) | CIMMYT, Mexico | Semi-dwarf, awned spike, waxy leaves, <i>Rht1</i> gene |
| 262 | BW49092 | BECARD/KACHU                                                            | CIMMYT, Mexico (CIMMYT line) | CIMMYT, Mexico | Semi-dwarf, awned spike, waxy leaves, <i>Rht1</i> gene |
| 263 | BW49093 | BECARD/KACHU                                                            | CIMMYT, Mexico (CIMMYT line) | CIMMYT, Mexico | Semi-dwarf, awned spike, waxy leaves, <i>Rht1</i> gene |
| 264 | BW49399 | ALTAR 84/AE.SQUARROSA (221)//3*BORL95/3/URES/JUN//KAUZ /4/WBLL1/5/MUTUS | CIMMYT, Mexico (CIMMYT line) | CIMMYT, Mexico | Semi-dwarf, awned spike, waxy leaves, <i>Rht1</i> gene |
| 265 | BW49095 | TRCH/HUIRIVIS #1                                                        | CIMMYT, Mexico (CIMMYT line) | CIMMYT, Mexico | Semi-dwarf, awned spike, waxy leaves, <i>Rht1</i> gene |
| 266 | BW49097 | BECARD/AKURI                                                            | CIMMYT, Mexico (CIMMYT line) | CIMMYT, Mexico | Semi-dwarf, awned spike, waxy leaves, <i>Rht1</i> gene |
| 267 | BW49099 | KINGBIRD #1//INQALAB 91*2/TUKURU                                        | CIMMYT, Mexico (CIMMYT line) | CIMMYT, Mexico | Semi-dwarf, awned spike, waxy leaves, <i>Rht1</i> gene |
| 268 | BW49102 | QUELEA                                                                  | CIMMYT, Mexico (CIMMYT line) | CIMMYT, Mexico | Semi-dwarf, awned spike, waxy leaves, <i>Rht1</i> gene |
| 269 | BW49108 | UP2338*2/VIVITSI/3/FRET2/TUKURU//FRET2/4/MISR 1                         | CIMMYT, Mexico (CIMMYT line) | CIMMYT, Mexico | Semi-dwarf, awned spike, waxy leaves, <i>Rht1</i> gene |
| 270 | BW49109 | WAXBILL                                                                 | CIMMYT, Mexico (CIMMYT line) | CIMMYT, Mexico | Semi-dwarf, awned spike, waxy leaves, <i>Rht1</i> gene |

|     |         |                                                                      |                              |                |                                                        |
|-----|---------|----------------------------------------------------------------------|------------------------------|----------------|--------------------------------------------------------|
| 271 | BW49110 | BAV92//IRENA/KAUZ/3/HUITES/4/GONDO/TNMU/5/BAV92//IRENA/KAUZ/3/HUITES | CIMMYT, Mexico (CIMMYT line) | CIMMYT, Mexico | Semi-dwarf, awned spike, waxy leaves, <i>Rht1</i> gene |
| 272 | BW49111 | WBLL1*2/TUKURU//FN/2*PASTOR/3/FRET2/KIRITATI                         | CIMMYT, Mexico (CIMMYT line) | CIMMYT, Mexico | Semi-dwarf, awned spike, waxy leaves, <i>Rht1</i> gene |
| 273 | BW49112 | PVN/5/2*REH/HARE//2*BCN/3/CROC_1/AE.SQUARROSA (213)//PGO/4/HUITES    | CIMMYT, Mexico (CIMMYT line) | CIMMYT, Mexico | Semi-dwarf, awned spike, waxy leaves, <i>Rht1</i> gene |
| 274 | BW49113 | KFA/2*KACHU                                                          | CIMMYT, Mexico (CIMMYT line) | CIMMYT, Mexico | Semi-dwarf, awned spike, waxy leaves, <i>Rht1</i> gene |
| 275 | BW49922 | CHIBIA//PRLII/CM65531/3/MISR2, EGY/4/MUNAL #1                        | CIMMYT, Mexico (CIMMYT line) | CIMMYT, Mexico | Semi-dwarf, awned spike, waxy leaves, <i>Rht1</i> gene |
| 276 | BW49923 | KACHU//WBLL1*2/BRAMBLING                                             | CIMMYT, Mexico (CIMMYT line) | CIMMYT, Mexico | Semi-dwarf, awned spike, waxy leaves, <i>Rht1</i> gene |
| 277 | BW49924 | KACHU/KIRITATI                                                       | CIMMYT, Mexico (CIMMYT line) | CIMMYT, Mexico | Semi-dwarf, awned spike, waxy leaves, <i>Rht1</i> gene |
| 278 | BW49927 | SUP152/BAJ #1                                                        | CIMMYT, Mexico (CIMMYT line) | CIMMYT, Mexico | Semi-dwarf, awned spike, waxy leaves, <i>Rht1</i> gene |
| 279 | BW49929 | SUP152/BECARD                                                        | CIMMYT, Mexico (CIMMYT line) | CIMMYT, Mexico | Semi-dwarf, awned spike, waxy leaves, <i>Rht1</i> gene |
| 280 | BW49931 | WBLL4/KUKUNA//WBLL1/3/WBLL1*2/BRAMBLING                              | CIMMYT, Mexico (CIMMYT line) | CIMMYT, Mexico | Semi-dwarf, awned spike, waxy leaves, <i>Rht1</i> gene |

|     |         |                                                  |                              |                |                                                                         |
|-----|---------|--------------------------------------------------|------------------------------|----------------|-------------------------------------------------------------------------|
| 281 | BW49932 | ITP40/AKURI                                      | CIMMYT, Mexico (CIMMYT line) | CIMMYT, Mexico | Semi-dwarf, awned spike, waxy leaves, <i>Rht1</i> gene                  |
| 282 | BW49933 | KIRITATI/WBLL1//MESIA/3/KIRITATI/WBLL1           | CIMMYT, Mexico (CIMMYT line) | CIMMYT, Mexico | Semi-dwarf, awned spike, waxy leaves, <i>Rht1</i> gene                  |
| 283 | BW49934 | KIRITATI/WBLL1//2*BLOUK #1                       | CIMMYT, Mexico (CIMMYT line) | CIMMYT, Mexico | Semi-dwarf, awned spike, waxy leaves, <i>Rht1</i> gene                  |
| 284 | BW49936 | SUP152/AKURI//SUP152                             | CIMMYT, Mexico (CIMMYT line) | CIMMYT, Mexico | Semi-dwarf, awned spike, waxy leaves, <i>Rht1</i> gene                  |
| 285 | BW49939 | MUTUS*2/AKURI                                    | CIMMYT, Mexico (CIMMYT line) | CIMMYT, Mexico | Semi-dwarf, awned spike, waxy leaves, <i>Rht1</i> and <i>Rht2</i> genes |
| 286 | BW49943 | PBW343*2/KUKUNA/3/PASTOR//CHIL/PRL/4/GRACK       | CIMMYT, Mexico (CIMMYT line) | CIMMYT, Mexico | Semi-dwarf, awned spike, waxy leaves, <i>Rht1</i> gene                  |
| 287 | BW49948 | BECARD/FRNCLN                                    | CIMMYT, Mexico (CIMMYT line) | CIMMYT, Mexico | Semi-dwarf, awned spike, waxy leaves, <i>Rht1</i> gene                  |
| 288 | BW49949 | WBLL1*2/BRAMBLING//CHYAK                         | CIMMYT, Mexico (CIMMYT line) | CIMMYT, Mexico | Semi-dwarf, awned spike, waxy leaves, <i>Rht1</i> gene                  |
| 289 | BW49950 | BECARD//ND643/2*WBLL1                            | CIMMYT, Mexico (CIMMYT line) | CIMMYT, Mexico | Semi-dwarf, awned spike, waxy leaves, <i>Rht1</i> gene                  |
| 290 | BW49953 | KAUZ*2/MNV//KAUZ/3/MILAN/4/BAV92/5/AKURI/6/MUTUS | CIMMYT, Mexico (CIMMYT line) | CIMMYT, Mexico | Semi-dwarf, awned spike, waxy leaves, <i>Rht1</i> gene                  |



|     |         |                                                                                                      |                              |                |                                                        |
|-----|---------|------------------------------------------------------------------------------------------------------|------------------------------|----------------|--------------------------------------------------------|
| 291 | BW49954 | KACHU/BECARD//WBLL1*2/BRAMBLING                                                                      | CIMMYT, Mexico (CIMMYT line) | CIMMYT, Mexico | Semi-dwarf, awned spike, waxy leaves, <i>Rht1</i> gene |
| 292 | BW49955 | KAUZ/PASTOR//PBW343/3/KIRITATI/4/FRNCLN                                                              | CIMMYT, Mexico (CIMMYT line) | CIMMYT, Mexico | Semi-dwarf, awned spike, waxy leaves, <i>Rht1</i> gene |
| 293 | BW49956 | SUP152*2/TECUE #1                                                                                    | CIMMYT, Mexico (CIMMYT line) | CIMMYT, Mexico | Semi-dwarf, awned spike, waxy leaves, <i>Rht1</i> gene |
| 294 | BW49957 | FRANCOLIN #1/AKURI #1//FRNCLN                                                                        | CIMMYT, Mexico (CIMMYT line) | CIMMYT, Mexico | Semi-dwarf, awned spike, waxy leaves, <i>Rht1</i> gene |
| 295 | BW49958 | ND643/2*TRCH//MUTUS/3/SUP152                                                                         | CIMMYT, Mexico (CIMMYT line) | CIMMYT, Mexico | Semi-dwarf, awned spike, waxy leaves, <i>Rht1</i> gene |
| 296 | BW48314 | WBLL1*2/4/YACO/PBW65/3/KAUZ*2/TRAP//KAUZ/5/KACHU #1                                                  | CIMMYT, Mexico (CIMMYT line) | CIMMYT, Mexico | Semi-dwarf, awned spike, waxy leaves, <i>Rht1</i> gene |
| 297 | BW49217 | ALTAR 84/AE.SQUARROSA (221)//3*BORL95/3/URES/JUN//KAUZ/4/WBLL1/5/REH/HARE//2*BCN/3/CROC_1/AE.SQUARRO | CIMMYT, Mexico (CIMMYT line) | CIMMYT, Mexico | Semi-dwarf, awned spike, waxy leaves, <i>Rht1</i> gene |
| 298 | BW49307 | WBLL1*2/KURUKU*2/5/REH/HARE//2*BCN/3/CROC_1/AE.SQUARROSA (213)//PGO/4/HUITES                         | CIMMYT, Mexico (CIMMYT line) | CIMMYT, Mexico | Semi-dwarf, awned spike, waxy leaves, <i>Rht1</i> gene |
| 299 | BW49325 | ATTILA*2/PBW65*2/4/BOW/NKT//C BRD/3/CBRD                                                             | CIMMYT, Mexico (CIMMYT line) | CIMMYT, Mexico | Semi-dwarf, awned spike, waxy leaves, <i>Rht1</i> gene |

|     |         |                                               |                                 |                |                                                                               |
|-----|---------|-----------------------------------------------|---------------------------------|----------------|-------------------------------------------------------------------------------|
| 300 | BW49326 | ATTILA*2/PBW65*2/4/BOW/NKT//C<br>BRD/3/CBRD   | CIMMYT, Mexico (CIMMYT<br>line) | CIMMYT, Mexico | Semi-dwarf, awned<br>spike, waxy leaves, <i>Rht1</i><br>and <i>Rht2</i> genes |
| 301 | BW49327 | ATTILA*2/PBW65*2/4/BOW/NKT//C<br>BRD/3/CBRD   | CIMMYT, Mexico (CIMMYT<br>line) | CIMMYT, Mexico | Semi-dwarf, awned<br>spike, waxy leaves, <i>Rht1</i><br>gene                  |
| 302 | BW49328 | ATTILA*2/PBW65*2/4/BOW/NKT//C<br>BRD/3/CBRD   | CIMMYT, Mexico (CIMMYT<br>line) | CIMMYT, Mexico | Semi-dwarf, awned<br>spike, waxy leaves, <i>Rht1</i><br>gene                  |
| 303 | BW49329 | ATTILA*2/PBW65*2/4/BOW/NKT//C<br>BRD/3/CBRD   | CIMMYT, Mexico (CIMMYT<br>line) | CIMMYT, Mexico | Semi-dwarf, awned<br>spike, waxy leaves, <i>Rht1</i><br>gene                  |
| 304 | BW49330 | ATTILA*2/PBW65*2/4/BOW/NKT//C<br>BRD/3/CBRD   | CIMMYT, Mexico (CIMMYT<br>line) | CIMMYT, Mexico | Semi-dwarf, awned<br>spike, waxy leaves, <i>Rht1</i><br>gene                  |
| 305 | BW49331 | ATTILA*2/PBW65*2/4/BOW/NKT//C<br>BRD/3/CBRD   | CIMMYT, Mexico (CIMMYT<br>line) | CIMMYT, Mexico | Semi-dwarf, awned<br>spike, waxy leaves, <i>Rht1</i><br>gene                  |
| 306 | BW49333 | BAV92//IRENA/KAUZ/3/HUITES*2/4/<br>GONDO/TNMU | CIMMYT, Mexico (CIMMYT<br>line) | CIMMYT, Mexico | Semi-dwarf, awned<br>spike, waxy leaves, <i>Rht1</i><br>gene                  |
| 307 | BW49342 | KACHU*2//CHIL/CHUM18                          | CIMMYT, Mexico (CIMMYT<br>line) | CIMMYT, Mexico | Semi-dwarf, awned<br>spike, waxy leaves, <i>Rht2</i><br>gene                  |
| 308 | BW49351 | KACHU #1*2/WHEAR                              | CIMMYT, Mexico (CIMMYT<br>line) | CIMMYT, Mexico | Semi-dwarf, awned<br>spike, waxy leaves, <i>Rht1</i><br>gene                  |
| 309 | BW49385 | FRANCOLIN<br>#1//WBLL1*2/BRAMBLING            | CIMMYT, Mexico (CIMMYT<br>line) | CIMMYT, Mexico | Semi-dwarf, awned<br>spike, waxy leaves, <i>Rht1</i><br>gene                  |

|     |          |                                                                         |                                          |                |                                                                         |
|-----|----------|-------------------------------------------------------------------------|------------------------------------------|----------------|-------------------------------------------------------------------------|
| 310 | BW49392  | BECARD/KACHU                                                            | CIMMYT, Mexico (CIMMYT line)             | CIMMYT, Mexico | Semi-dwarf, awned spike, waxy leaves, <i>Rht1</i> gene                  |
| 311 | BW49394  | BECARD/KACHU                                                            | CIMMYT, Mexico (CIMMYT line)             | CIMMYT, Mexico | Semi-dwarf, awned spike, waxy leaves, <i>Rht1</i> gene                  |
| 312 | BW49094  | ALTAR 84/AE.SQUARROSA (221)//3*BORL95/3/URES/JUN//KAUZ /4/WBLL1/5/MUTUS | CIMMYT, Mexico (CIMMYT line)             | CIMMYT, Mexico | Semi-dwarf, awned spike, waxy leaves, <i>Rht1</i> gene                  |
| 313 | BW49400  | ALTAR 84/AE.SQUARROSA (221)//3*BORL95/3/URES/JUN//KAUZ /4/WBLL1/5/MUTUS | CIMMYT, Mexico (CIMMYT line)             | CIMMYT, Mexico | Semi-dwarf, awned spike, waxy leaves, <i>Rht1</i> gene                  |
| 314 | BW49099  | KINGBIRD #1//INQALAB 91*2/TUKURU                                        | CIMMYT, Mexico (CIMMYT line)             | CIMMYT, Mexico | Semi-dwarf, awned spike, waxy leaves, <i>Rht1</i> and <i>Rht2</i> genes |
| 315 | BW49448  | ATTILA*2/PBW65*2//TOBA97/PASTOR                                         | CIMMYT, Mexico (CIMMYT line)             | CIMMYT, Mexico | Semi-dwarf, awned spike, waxy leaves, <i>Rht1</i> gene                  |
| 316 | BW49456  | WBLL1*2/VIVITSI//PRINIA/PASTOR /3/WBLL1*2/BRAMBLING                     | CIMMYT, Mexico (CIMMYT line)             | CIMMYT, Mexico | Semi-dwarf, awned spike, waxy leaves, <i>Rht1</i> gene                  |
| 317 | BW49458  | NAC/TH.AC//3*PVN/3/MIRLO/BUC/4 /2*PASTOR/5/KACHU/6/KACHU                | CIMMYT, Mexico (CIMMYT line)             | CIMMYT, Mexico | Semi-dwarf, awned spike, waxy leaves, <i>Rht1</i> gene                  |
| 318 | Pasteur  | Cadenza//Palermo/KS91WGRC11                                             | Wheat breeding lab, University of Guelph | Netherlands    | Hard red spring, awnless spike, waxy leaves, no <i>Rht</i> genes        |
| 319 | Carberry | Alsen/Superb                                                            | Wheat breeding lab, University of Guelph | Canada         | Red spring, awned spike, <i>Rht1</i> gene                               |
| 320 | Norwell  | Max/PT742//Bluesky///Max/Coteau//Bluesky                                | Wheat breeding lab, University of Guelph | Canada         | Hard red spring, awned spike, no <i>Rht</i> genes                       |
