# Supplementary material for: Population structure of Nepali spring wheat (Triticum aestivum L.) germplasm
Source: PubMed Central journal article supplement (PMC7682013; doi:10.1186/s12870-020-02722-8), 2020-11-23
Supplement: 12870_2020_2722_MOESM2_ESM.pdf [file 12870_2020_2722_MOESM2_ESM.pdf]

**Manuscript title:**

Population Structure of Nepali Spring Wheat (*Triticum aestivum* L.) Germplasm

**Journal:**

BMC Plant Biology

**Authors:**

\*Kamal Khadka<sup>1</sup>, Davoud Torkamaneh<sup>1,2,3</sup>, Mina Kaviani<sup>1</sup>, Francois Belzile<sup>2,3</sup>, Manish N. Raizada<sup>1</sup> and Alireza Navabi<sup>1</sup>

**Affiliation:**

\*<sup>1</sup> Department of Plant Agriculture, University of Guelph, Guelph, Ontario, Canada, N1G 2W1

**Corresponding author email address:**

[kamal.khadka011@gmail.com](mailto:kamal.khadka011@gmail.com)

**Additional file 1: Table S2.** Summary of distribution of SNPs in wheat genomes across 21 chromosomes in the Nepali Wheat Diversity Panel

| Chromosomes | Genome   |          |          | Total |
|-------------|----------|----------|----------|-------|
|             | Genome A | Genome B | Genome C |       |
| 1           | 5377     | 6544     | 1883     | 13804 |
| 2           | 6422     | 8374     | 2046     | 16842 |
| 3           | 4881     | 7806     | 1247     | 13934 |
| 4           | 4808     | 2648     | 550      | 8006  |
| 5           | 4494     | 6647     | 1013     | 12154 |
| 6           | 3979     | 7952     | 1343     | 13274 |
| 7           | 7578     | 8264     | 1532     | 17374 |
| Total       | 37539    | 48235    | 9614     | 95388 |
