# Supplementary material for: Population structure of Nepali spring wheat (Triticum aestivum L.) germplasm
Source: PubMed Central journal article supplement (PMC7682013; doi:10.1186/s12870-020-02722-8), 2020-11-23
Supplement: 12870_2020_2722_MOESM3_ESM.pdf [file 12870_2020_2722_MOESM3_ESM.pdf]

**Manuscript title:**Population Structure of Nepali Spring Wheat (*Triticum aestivum* L.) Germplasm**Journal:**

BMC Plant Biology

**Authors:**\*Kamal Khadka<sup>1</sup>, Davoud Torkamaneh<sup>1,2,3</sup>, Mina Kaviani<sup>1</sup>, Francois Belzile<sup>2,3</sup>, Manish N. Raizada<sup>1</sup> and Alireza Navabi<sup>1</sup>**Affiliation:**\*<sup>1</sup> Department of Plant Agriculture, University of Guelph, Guelph, Ontario, Canada, N1G 2W1**Corresponding author email address:**[kamal.khadka011@gmail.com](mailto:kamal.khadka011@gmail.com)**Additional file 3: Table S3.** Assignment of individual accession in the Nepali Wheat Diversity Panel to different subpopulation based on Q-matrix obtained from fastSTRUCTURE

| Entry | ID          | Subpopulation assigned | Q-matrix for K=4 |          |          |          |
|-------|-------------|------------------------|------------------|----------|----------|----------|
| 310   | BW49392     | 2                      | 0.000001         | 0.999996 | 0.000001 | 0.000001 |
| 112   | NGRC 04410  | 3                      | 0.06723          | 0.000001 | 0.932768 | 0.000001 |
| 311   | BW49394     | 2                      | 0.000001         | 0.999996 | 0.000001 | 0.000001 |
| 94    | NGRC 02622  | 3                      | 0.442918         | 0.000001 | 0.55708  | 0.000001 |
| 28    | NGRC 02472  | 4                      | 0.000001         | 0.288455 | 0.000001 | 0.711542 |
| 128   | NGRC 04430  | 1                      | 0.613955         | 0.000001 | 0.386042 | 0.000001 |
| 64    | NGRC 02584  | 4                      | 0.000001         | 0.000001 | 0.000001 | 0.999996 |
| 283   | BW49934     | 2                      | 0.045469         | 0.908875 | 0.000001 | 0.045654 |
| 191   | Pasanglhamu | 2                      | 0.000001         | 0.882494 | 0.022348 | 0.095157 |
| 167   | NGRC 04474  | 3                      | 0.000001         | 0.000001 | 0.999996 | 0.000001 |
| 248   | BW49069     | 2                      | 0.000001         | 0.999996 | 0.000001 | 0.000001 |
| 144   | NGRC 04450  | 4                      | 0.000001         | 0.000001 | 0.391668 | 0.608329 |
| 202   | BW30655     | 2                      | 0.025076         | 0.938789 | 0.036133 | 0.000001 |
| 41    | NGRC 02557  | 3                      | 0.386425         | 0.000001 | 0.595937 | 0.017637 |
| 227   | BW48140     | 2                      | 0.000256         | 0.990452 | 0.000001 | 0.00929  |
| 99    | NGRC 02630  | 1                      | 0.999996         | 0.000001 | 0.000001 | 0.000001 |
| 209   | BW45568     | 2                      | 0.000001         | 0.999996 | 0.000001 | 0.000001 |
| 109   | NGRC 04406  | 1                      | 0.999996         | 0.000001 | 0.000001 | 0.000001 |
| 182   | Annapurna 2 | 2                      | 0.043254         | 0.956743 | 0.000001 | 0.000001 |
| 45    | NGRC 02561  | 4                      | 0.000001         | 0.000001 | 0.043952 | 0.956046 |
| 303   | BW49329     | 2                      | 0.000001         | 0.999996 | 0.000001 | 0.000001 |
| 51    | NGRC 02568  | 3                      | 0.000001         | 0.000001 | 0.999996 | 0.000001 |
| 188   | Achyut      | 2                      | 0.000001         | 0.939489 | 0.000001 | 0.060508 |
| 242   | BW48162     | 2                      | 0.000001         | 0.999996 | 0.000001 | 0.000001 |
| 273   | BW49112     | 2                      | 0.000001         | 0.954749 | 0.000001 | 0.045248 |
| 150   | NGRC 04456  | 2                      | 0.000001         | 0.999996 | 0.000001 | 0.000001 |
| 57    | NGRC 02575  | 3                      | 0.134169         | 0.000001 | 0.865828 | 0.000001 |
| 18    | NGRC 02458  | 1                      | 0.999996         | 0.000001 | 0.000001 | 0.000001 |
| 90    | NGRC 02617  | 1                      | 0.972192         | 0.000001 | 0.027805 | 0.000001 |

|     |             |   |          |          |          |          |
|-----|-------------|---|----------|----------|----------|----------|
| 223 | BW48136     | 2 | 0.000001 | 0.999996 | 0.000001 | 0.000001 |
| 186 | BL 1135     | 4 | 0.017668 | 0.380052 | 0.000001 | 0.602278 |
| 9   | NGRC 00205  | 3 | 0.000001 | 0.000001 | 0.999996 | 0.000001 |
| 140 | NGRC 04446  | 3 | 0.083778 | 0.000001 | 0.901894 | 0.014327 |
| 249 | BW49227     | 2 | 0.000001 | 0.999996 | 0.000001 | 0.000001 |
| 29  | NGRC 02496  | 3 | 0.000001 | 0.000001 | 0.999996 | 0.000001 |
| 130 | NGRC 04432  | 3 | 0.268263 | 0.000001 | 0.731734 | 0.000001 |
| 63  | NGRC 02582  | 3 | 0.000001 | 0.000001 | 0.999996 | 0.000001 |
| 298 | BW49307     | 2 | 0.000001 | 0.829941 | 0.001669 | 0.168388 |
| 319 | Carberry    | 4 | 0.051663 | 0.367847 | 0.034703 | 0.545787 |
| 219 | BW45595     | 2 | 0.000001 | 0.9108   | 0.037488 | 0.051711 |
| 260 | BW49089     | 2 | 0.000001 | 0.820218 | 0.000001 | 0.179779 |
| 213 | BW45578     | 2 | 0.015691 | 0.917175 | 0.000001 | 0.067133 |
| 16  | NGRC 02456  | 3 | 0.346522 | 0.000001 | 0.653475 | 0.000001 |
| 284 | BW49936     | 2 | 0.033709 | 0.790719 | 0.019915 | 0.155656 |
| 176 | Vinayak     | 2 | 0.000001 | 0.616388 | 0.000001 | 0.383609 |
| 201 | Tilottama   | 2 | 0.000001 | 0.888882 | 0.000001 | 0.111115 |
| 270 | BW49109     | 2 | 0.17511  | 0.673614 | 0.115546 | 0.035731 |
| 3   | NGRC 00179  | 3 | 0.06003  | 0.000001 | 0.939968 | 0.000001 |
| 208 | BW44908     | 2 | 0.000001 | 0.702373 | 0.020998 | 0.276627 |
| 55  | NGRC 02572  | 3 | 0.000001 | 0.000001 | 0.999996 | 0.000001 |
| 275 | BW49922     | 2 | 0.005736 | 0.91925  | 0.000001 | 0.075013 |
| 281 | BW49932     | 2 | 0.007153 | 0.822022 | 0.000001 | 0.170823 |
| 85  | NGRC 02611  | 1 | 0.999996 | 0.000001 | 0.000001 | 0.000001 |
| 233 | BW48150     | 2 | 0.012842 | 0.660921 | 0.000001 | 0.326235 |
| 308 | BW49351     | 2 | 0.000001 | 0.999996 | 0.000001 | 0.000001 |
| 73  | NGRC 02595  | 4 | 0.000001 | 0.120396 | 0.115633 | 0.76397  |
| 183 | Annapurna 3 | 2 | 0.038399 | 0.961598 | 0.000001 | 0.000001 |
| 160 | NGRC 04466  | 3 | 0.000001 | 0.018348 | 0.540677 | 0.440974 |
| 317 | BW49458     | 2 | 0.000001 | 0.999996 | 0.000001 | 0.000001 |
| 42  | NGRC 02558  | 3 | 0.383517 | 0.000001 | 0.61648  | 0.000001 |
| 157 | NGRC 04463  | 3 | 0.000001 | 0.000001 | 0.999996 | 0.000001 |
| 8   | NGRC 00204  | 3 | 0.000001 | 0.000001 | 0.999996 | 0.000001 |
| 47  | NGRC 02564  | 2 | 0.000001 | 0.702277 | 0.000001 | 0.29772  |
| 212 | BW45173     | 2 | 0.000001 | 0.631328 | 0.07073  | 0.29794  |
| 215 | BW45592     | 2 | 0.000001 | 0.999996 | 0.000001 | 0.000001 |
| 315 | BW49448     | 2 | 0.000001 | 0.999996 | 0.000001 | 0.000001 |
| 14  | NGRC 02452  | 3 | 0.385022 | 0.000001 | 0.614975 | 0.000001 |
| 258 | BW49084     | 2 | 0.000001 | 0.999996 | 0.000001 | 0.000001 |
| 169 | Kalyansona  | 2 | 0.000001 | 0.699429 | 0.000001 | 0.300569 |
| 203 | BW35623     | 2 | 0.000001 | 0.660191 | 0.000001 | 0.339806 |
| 178 | Vaskar      | 2 | 0.000001 | 0.873527 | 0.000001 | 0.126471 |
| 257 | BW49344     | 2 | 0.000001 | 0.773478 | 0.000001 | 0.22652  |
| 141 | NGRC 04447  | 2 | 0.000001 | 0.999996 | 0.000001 | 0.000001 |
| 83  | NGRC 02609  | 4 | 0.000001 | 0.000001 | 0.493544 | 0.506453 |
| 89  | NGRC 02615  | 1 | 0.999996 | 0.000001 | 0.000001 | 0.000001 |
| 113 | NGRC 04413  | 3 | 0.000001 | 0.000001 | 0.999996 | 0.000001 |
| 276 | BW49923     | 2 | 0.000001 | 0.999996 | 0.000001 | 0.000001 |
| 135 | NGRC 04439  | 1 | 0.484748 | 0.070068 | 0.274427 | 0.170757 |
| 56  | NGRC 02574  | 3 | 0.000001 | 0.000001 | 0.999996 | 0.000001 |
| 125 | NGRC 04427  | 2 | 0.111846 | 0.529512 | 0.000001 | 0.358641 |
| 166 | NGRC 04473  | 2 | 0.000001 | 0.999996 | 0.000001 | 0.000001 |
| 116 | NGRC 04417  | 3 | 0.000001 | 0.000001 | 0.999996 | 0.000001 |
| 259 | BW49088     | 3 | 0.000001 | 0.000001 | 0.999996 | 0.000001 |
| 301 | BW49327     | 4 | 0.035611 | 0.370952 | 0.021824 | 0.571613 |

|     |             |   |          |          |          |          |
|-----|-------------|---|----------|----------|----------|----------|
| 153 | NGRC 04459  | 2 | 0.000001 | 0.823506 | 0.000001 | 0.176491 |
| 232 | BW48149     | 1 | 0.999996 | 0.000001 | 0.000001 | 0.000001 |
| 11  | NGRC 02449  | 2 | 0.000001 | 0.945863 | 0.000001 | 0.054134 |
| 300 | BW49326     | 3 | 0.359342 | 0.000001 | 0.640655 | 0.000001 |
| 77  | NGRC 02603  | 2 | 0.000001 | 0.924641 | 0.000001 | 0.075356 |
| 10  | NGRC 02448  | 2 | 0.036612 | 0.963385 | 0.000001 | 0.000001 |
| 145 | NGRC 04451  | 2 | 0.198288 | 0.658532 | 0.000001 | 0.143178 |
| 199 | Dhaulagiri  | 3 | 0.000001 | 0.000001 | 0.999996 | 0.000001 |
| 48  | NGRC 02565  | 2 | 0.000001 | 0.999996 | 0.000001 | 0.000001 |
| 226 | BW48171     | 3 | 0.000001 | 0.000001 | 0.999996 | 0.000001 |
| 306 | BW49333     | 2 | 0.000001 | 0.999996 | 0.000001 | 0.000001 |
| 103 | NGRC 04399  | 2 | 0.000001 | 0.999996 | 0.000001 | 0.000001 |
| 246 | BW48169     | 4 | 0.000001 | 0.000001 | 0.000001 | 0.999996 |
| 62  | NGRC 02581  | 3 | 0.000001 | 0.000001 | 0.999996 | 0.000001 |
| 36  | NGRC 02551  | 2 | 0.000001 | 0.999996 | 0.000001 | 0.000001 |
| 320 | Norwell     | 2 | 0.000001 | 0.999996 | 0.000001 | 0.000001 |
| 218 | BW45165     | 2 | 0.000001 | 0.765292 | 0.000001 | 0.234705 |
| 75  | NGRC 02599  | 4 | 0.000001 | 0.181149 | 0.000001 | 0.818848 |
| 92  | NGRC 02620  | 3 | 0.000001 | 0.000001 | 0.999996 | 0.000001 |
| 272 | BW49111     | 4 | 0.033021 | 0.15921  | 0.077163 | 0.730606 |
| 132 | NGRC 04434  | 3 | 0.002042 | 0.000001 | 0.997955 | 0.000001 |
| 292 | BW49955     | 4 | 0.000001 | 0.000001 | 0.476847 | 0.52315  |
| 184 | BL 1022     | 4 | 0.000001 | 0.18599  | 0.000001 | 0.814007 |
| 221 | BW48133     | 2 | 0.000001 | 0.999996 | 0.000001 | 0.000001 |
| 261 | BW49391     | 1 | 0.65861  | 0.000001 | 0.341388 | 0.000001 |
| 147 | NGRC 04453  | 2 | 0.003896 | 0.889542 | 0.035568 | 0.070995 |
| 224 | BW48137     | 2 | 0.000001 | 0.840046 | 0.000001 | 0.159952 |
| 263 | BW49093     | 2 | 0.008842 | 0.849106 | 0.000001 | 0.14205  |
| 24  | NGRC 02466  | 2 | 0.000001 | 0.787369 | 0.000001 | 0.212628 |
| 60  | NGRC 02579  | 3 | 0.000001 | 0.000001 | 0.999996 | 0.000001 |
| 115 | NGRC 04416  | 2 | 0.000001 | 0.758305 | 0.000001 | 0.241692 |
| 247 | BW48168     | 2 | 0.000001 | 0.813883 | 0.000001 | 0.186115 |
| 299 | BW49325     | 1 | 0.999996 | 0.000001 | 0.000001 | 0.000001 |
| 285 | BW49939     | 4 | 0.000001 | 0.000001 | 0.221658 | 0.77834  |
| 35  | NGRC 02550  | 2 | 0.000001 | 0.469712 | 0.085233 | 0.445054 |
| 174 | Lumbini     | 2 | 0.000001 | 0.690828 | 0.01186  | 0.297311 |
| 133 | NGRC 04436  | 2 | 0.000001 | 0.999996 | 0.000001 | 0.000001 |
| 121 | NGRC 04423  | 1 | 0.433614 | 0.210728 | 0.000001 | 0.355656 |
| 172 | NL 30       | 2 | 0.000001 | 0.945479 | 0.000001 | 0.054518 |
| 253 | BW49077     | 3 | 0.000001 | 0.000001 | 0.999996 | 0.000001 |
| 97  | NGRC 02625  | 3 | 0.000001 | 0.000001 | 0.999996 | 0.000001 |
| 108 | NGRC 04405  | 3 | 0.000001 | 0.000001 | 0.999996 | 0.000001 |
| 277 | BW49924     | 3 | 0.001835 | 0.000001 | 0.998162 | 0.000001 |
| 104 | NGRC 04400  | 3 | 0.000001 | 0.000001 | 0.999996 | 0.000001 |
| 84  | NGRC 02610  | 2 | 0.000001 | 0.571072 | 0.428926 | 0.000001 |
| 316 | BW49456     | 2 | 0.000001 | 0.502849 | 0.087676 | 0.409473 |
| 190 | Kanti       | 2 | 0.000001 | 0.999996 | 0.000001 | 0.000001 |
| 266 | BW49097     | 4 | 0.000001 | 0.000001 | 0.000001 | 0.999996 |
| 54  | NGRC 02571  | 2 | 0.000001 | 0.80197  | 0.000001 | 0.198027 |
| 120 | NGRC 04422  | 3 | 0.000001 | 0.000001 | 0.999996 | 0.000001 |
| 187 | Annapurna 4 | 3 | 0.271438 | 0.000001 | 0.728559 | 0.000001 |
| 280 | BW49931     | 2 | 0.000001 | 0.808447 | 0.000001 | 0.191551 |
| 114 | NGRC 04414  | 2 | 0.000001 | 0.630169 | 0.05236  | 0.317469 |
| 262 | BW49092     | 2 | 0.050094 | 0.803962 | 0.000001 | 0.145943 |
| 168 | Lerma 52    | 4 | 0.063344 | 0.248897 | 0.000001 | 0.687758 |

|     |             |   |          |          |          |          |
|-----|-------------|---|----------|----------|----------|----------|
| 236 | BW48155     | 2 | 0.000001 | 0.999996 | 0.000001 | 0.000001 |
| 111 | NGRC 04409  | 2 | 0.000001 | 0.882593 | 0.000001 | 0.117404 |
| 119 | NGRC 04421  | 2 | 0.000001 | 0.999996 | 0.000001 | 0.000001 |
| 106 | NGRC 04402  | 2 | 0.000001 | 0.732176 | 0.000001 | 0.267821 |
| 15  | NGRC 02455  | 2 | 0.000001 | 0.973332 | 0.000001 | 0.026665 |
| 38  | NGRC 02553  | 3 | 0.446493 | 0.000001 | 0.553504 | 0.000001 |
| 156 | NGRC 04462  | 4 | 0.000001 | 0.418709 | 0.000001 | 0.581288 |
| 200 | Danphe      | 1 | 0.999996 | 0.000001 | 0.000001 | 0.000001 |
| 100 | NGRC 02631  | 3 | 0.000001 | 0.000001 | 0.999996 | 0.000001 |
| 286 | BW49943     | 1 | 0.999996 | 0.000001 | 0.000001 | 0.000001 |
| 123 | NGRC 04425  | 2 | 0.000001 | 0.999996 | 0.000001 | 0.000001 |
| 235 | BW48154     | 1 | 0.5722   | 0.085154 | 0.146293 | 0.196353 |
| 27  | NGRC 02471  | 3 | 0.000001 | 0.000001 | 0.999996 | 0.000001 |
| 129 | NGRC 04431  | 2 | 0.000001 | 0.987975 | 0.000001 | 0.012022 |
| 70  | NGRC 02591  | 3 | 0.000001 | 0.000001 | 0.999996 | 0.000001 |
| 180 | NL 251      | 3 | 0.000001 | 0.000001 | 0.999996 | 0.000001 |
| 105 | NGRC 04401  | 2 | 0.000001 | 0.958438 | 0.022279 | 0.019282 |
| 170 | Pitic 62    | 2 | 0.000001 | 0.999996 | 0.000001 | 0.000001 |
| 239 | BW48172     | 3 | 0.000001 | 0.000001 | 0.999996 | 0.000001 |
| 237 | BW48156     | 2 | 0.000001 | 0.999996 | 0.000001 | 0.000001 |
| 287 | BW49948     | 4 | 0.000001 | 0.000001 | 0.10499  | 0.895007 |
| 252 | BW49075     | 4 | 0.000001 | 0.000001 | 0.000001 | 0.999996 |
| 118 | NGRC 04419  | 3 | 0.118942 | 0.119253 | 0.438735 | 0.323069 |
| 193 | Gautam      | 2 | 0.000001 | 0.988109 | 0.000001 | 0.011888 |
| 229 | BW48144     | 2 | 0.000001 | 0.999996 | 0.000001 | 0.000001 |
| 274 | BW49113     | 4 | 0.000001 | 0.194654 | 0.000001 | 0.805343 |
| 4   | NGRC 00180  | 3 | 0.000001 | 0.000001 | 0.999996 | 0.000001 |
| 127 | NGRC 04429  | 3 | 0.000001 | 0.000001 | 0.999996 | 0.000001 |
| 122 | NGRC 04424  | 2 | 0.000001 | 0.999996 | 0.000001 | 0.000001 |
| 282 | BW49933     | 1 | 0.999996 | 0.000001 | 0.000001 | 0.000001 |
| 264 | BW49399     | 2 | 0.000001 | 0.999996 | 0.000001 | 0.000001 |
| 71  | NGRC 02593  | 3 | 0.207427 | 0.000001 | 0.79257  | 0.000001 |
| 88  | NGRC 02614  | 4 | 0.223478 | 0.284567 | 0.000001 | 0.491953 |
| 164 | NGRC 04471  | 3 | 0.000001 | 0.000001 | 0.999996 | 0.000001 |
| 179 | Nepal 297   | 2 | 0.000001 | 0.999996 | 0.000001 | 0.000001 |
| 53  | NGRC 02570  | 4 | 0.000001 | 0.216597 | 0.000001 | 0.7834   |
| 82  | NGRC 02608  | 3 | 0.000001 | 0.000001 | 0.999996 | 0.000001 |
| 30  | NGRC 02544  | 1 | 0.492635 | 0.133866 | 0.000001 | 0.373498 |
| 206 | BW43354     | 2 | 0.000001 | 0.999996 | 0.000001 | 0.000001 |
| 294 | BW49957     | 3 | 0.000001 | 0.000001 | 0.999996 | 0.000001 |
| 87  | NGRC 02613  | 3 | 0.000001 | 0.000001 | 0.999996 | 0.000001 |
| 107 | NGRC 04404  | 3 | 0.000001 | 0.000001 | 0.999996 | 0.000001 |
| 195 | NL 971      | 2 | 0.000001 | 0.999996 | 0.000001 | 0.000001 |
| 46  | NGRC 02563  | 4 | 0.000001 | 0.000001 | 0.000001 | 0.999996 |
| 13  | NGRC 02451  | 4 | 0.225456 | 0.25633  | 0.050791 | 0.467422 |
| 110 | NGRC 04408  | 3 | 0.000001 | 0.000001 | 0.999996 | 0.000001 |
| 181 | Annapurna 1 | 3 | 0.000001 | 0.000001 | 0.999996 | 0.000001 |
| 288 | BW49949     | 2 | 0.000001 | 0.690186 | 0.000001 | 0.309811 |
| 171 | RR21        | 2 | 0.000001 | 0.87341  | 0.000001 | 0.126587 |
| 138 | NGRC 04444  | 2 | 0.009773 | 0.589282 | 0.000001 | 0.400944 |
| 5   | NGRC 00181  | 2 | 0.000001 | 0.970052 | 0.000001 | 0.029945 |
| 66  | NGRC 02586  | 2 | 0.000001 | 0.709486 | 0.000001 | 0.290511 |
| 312 | BW49094     | 3 | 0.000001 | 0.000001 | 0.999996 | 0.000001 |
| 44  | NGRC 02560  | 2 | 0.000049 | 0.980058 | 0.019892 | 0.000001 |
| 61  | NGRC 02580  | 3 | 0.229129 | 0.000001 | 0.770868 | 0.000001 |

|     |            |   |          |          |          |          |
|-----|------------|---|----------|----------|----------|----------|
| 23  | NGRC 02465 | 3 | 0.000001 | 0.000001 | 0.999996 | 0.000001 |
| 313 | BW49400    | 2 | 0.000001 | 0.59466  | 0.000007 | 0.405332 |
| 244 | BW48166    | 3 | 0.000001 | 0.000001 | 0.999996 | 0.000001 |
| 12  | NGRC 02450 | 4 | 0.000001 | 0.000001 | 0.000001 | 0.999996 |
| 159 | NGRC 04465 | 3 | 0.000001 | 0.000001 | 0.999996 | 0.000001 |
| 96  | NGRC 02624 | 2 | 0.000001 | 0.671682 | 0.000001 | 0.328315 |
| 134 | NGRC 04437 | 3 | 0.000001 | 0.000001 | 0.999996 | 0.000001 |
| 131 | NGRC 04433 | 2 | 0.000001 | 0.669872 | 0.000001 | 0.330125 |
| 302 | BW49328    | 3 | 0.000001 | 0.000001 | 0.999996 | 0.000001 |
| 175 | Tribeni    | 4 | 0.000001 | 0.28188  | 0.000001 | 0.718117 |
| 295 | BW49958    | 3 | 0.208129 | 0.000001 | 0.791868 | 0.000001 |
| 165 | NGRC 04472 | 3 | 0.000001 | 0.000001 | 0.999996 | 0.000001 |
| 279 | BW49929    | 3 | 0.21915  | 0.000001 | 0.780847 | 0.000001 |
| 251 | BW49072    | 1 | 0.999996 | 0.000001 | 0.000001 | 0.000001 |
| 102 | NGRC 02633 | 2 | 0.000001 | 0.662473 | 0.000001 | 0.337525 |
| 163 | NGRC 04470 | 1 | 0.551984 | 0.000001 | 0.448013 | 0.000001 |
| 21  | NGRC 02461 | 3 | 0.000001 | 0.000001 | 0.999996 | 0.000001 |
| 196 | Aditya     | 2 | 0.000001 | 0.999996 | 0.000001 | 0.000001 |
| 309 | BW49385    | 4 | 0.000001 | 0.000001 | 0.000001 | 0.999996 |
| 139 | NGRC 04445 | 2 | 0.142692 | 0.485802 | 0.046338 | 0.325168 |
| 149 | NGRC 04455 | 4 | 0.000001 | 0.225006 | 0.000001 | 0.774991 |
| 98  | NGRC 02629 | 2 | 0.000001 | 0.999996 | 0.000001 | 0.000001 |
| 39  | NGRC 02554 | 3 | 0.000001 | 0.000001 | 0.999996 | 0.000001 |
| 31  | NGRC 02546 | 4 | 0.000001 | 0.22001  | 0.000001 | 0.779987 |
| 81  | NGRC 02607 | 2 | 0.033451 | 0.792673 | 0.02254  | 0.151336 |
| 124 | NGRC 04426 | 2 | 0.0229   | 0.682484 | 0.000001 | 0.294614 |
| 68  | NGRC 02589 | 3 | 0.000001 | 0.000001 | 0.999996 | 0.000001 |
| 93  | NGRC 02621 | 3 | 0.000001 | 0.000001 | 0.999996 | 0.000001 |
| 256 | BW49082    | 3 | 0.27337  | 0.000001 | 0.726627 | 0.000001 |
| 314 | BW49099    | 3 | 0.000001 | 0.000001 | 0.999996 | 0.000001 |
| 225 | BW48139    | 2 | 0.055423 | 0.892314 | 0.000001 | 0.052261 |
| 69  | NGRC 02590 | 2 | 0.000001 | 0.688368 | 0.000001 | 0.311629 |
| 26  | NGRC 02470 | 3 | 0.000001 | 0.000001 | 0.999996 | 0.000001 |
| 1   | NGRC 00176 | 3 | 0.000001 | 0.000001 | 0.999996 | 0.000001 |
| 268 | BW49102    | 2 | 0.00936  | 0.60007  | 0.000001 | 0.390568 |
| 158 | NGRC 04464 | 3 | 0.000001 | 0.000001 | 0.999996 | 0.000001 |
| 117 | NGRC 04418 | 2 | 0.020656 | 0.52073  | 0.458613 | 0.000001 |
| 290 | BW49953    | 2 | 0.000001 | 0.999996 | 0.000001 | 0.000001 |
| 2   | NGRC 00177 | 4 | 0.000001 | 0.000001 | 0.000001 | 0.999996 |
| 189 | Rohini     | 2 | 0.000001 | 0.999996 | 0.000001 | 0.000001 |
| 91  | NGRC 02619 | 2 | 0.000001 | 0.994948 | 0.000001 | 0.005049 |
| 207 | BW44829    | 1 | 0.572075 | 0.095318 | 0.000001 | 0.332605 |
| 86  | NGRC 02612 | 4 | 0.046027 | 0.000001 | 0.230811 | 0.723161 |
| 136 | NGRC 04440 | 2 | 0.051273 | 0.521426 | 0.000001 | 0.4273   |
| 72  | NGRC 02594 | 4 | 0.000001 | 0.000001 | 0.000001 | 0.999996 |
| 43  | NGRC 02559 | 2 | 0.000001 | 0.468547 | 0.091384 | 0.440068 |
| 7   | NGRC 00202 | 1 | 0.999996 | 0.000001 | 0.000001 | 0.000001 |
| 197 | Vijay      | 2 | 0.000001 | 0.795105 | 0.002602 | 0.202292 |
| 243 | BW48163    | 3 | 0.031856 | 0.000001 | 0.968141 | 0.000001 |
| 148 | NGRC 04454 | 3 | 0.081633 | 0.000001 | 0.918364 | 0.000001 |
| 19  | NGRC 02459 | 2 | 0.000001 | 0.999996 | 0.000001 | 0.000001 |
| 152 | NGRC 04458 | 2 | 0.000001 | 0.999996 | 0.000001 | 0.000001 |
| 58  | NGRC 02576 | 3 | 0.025145 | 0.000001 | 0.974852 | 0.000001 |
| 173 | UP 262     | 1 | 0.999996 | 0.000001 | 0.000001 | 0.000001 |
| 151 | NGRC 04457 | 4 | 0.030541 | 0.412789 | 0.000572 | 0.556098 |

|     |            |   |          |          |          |          |
|-----|------------|---|----------|----------|----------|----------|
| 204 | BW43945    | 2 | 0.000325 | 0.980523 | 0.019151 | 0.000001 |
| 177 | Siddhartha | 2 | 0.000001 | 0.999895 | 0.000001 | 0.000102 |
| 126 | NGRC 04428 | 2 | 0.000001 | 0.999996 | 0.000001 | 0.000001 |
| 80  | NGRC 02606 | 2 | 0.013695 | 0.714944 | 0.000001 | 0.27136  |
| 293 | BW49956    | 3 | 0.000001 | 0.000001 | 0.999996 | 0.000001 |
| 65  | NGRC 02585 | 3 | 0.000001 | 0.000001 | 0.999996 | 0.000001 |
| 25  | NGRC 02467 | 2 | 0.000001 | 0.845388 | 0.0189   | 0.13571  |
| 296 | BW48314    | 2 | 0.000001 | 0.959926 | 0.000001 | 0.040071 |
| 22  | NGRC 02462 | 2 | 0.000001 | 0.905829 | 0.000001 | 0.094168 |
| 238 | BW48158    | 2 | 0.000001 | 0.999996 | 0.000001 | 0.000001 |
| 245 | BW48165    | 2 | 0.000001 | 0.68325  | 0.000001 | 0.316747 |
| 143 | NGRC 04449 | 2 | 0.000001 | 0.918791 | 0.000001 | 0.081207 |
| 240 | BW48174    | 2 | 0.008883 | 0.896411 | 0.000001 | 0.094705 |
| 192 | BL 1473    | 4 | 0.000001 | 0.000001 | 0.000001 | 0.999996 |
| 198 | Gaura      | 4 | 0.000001 | 0.000001 | 0.000001 | 0.999996 |
| 305 | BW49331    | 3 | 0.000001 | 0.000001 | 0.999996 | 0.000001 |
| 155 | NGRC 04461 | 3 | 0.000001 | 0.000001 | 0.999996 | 0.000001 |
| 222 | BW48135    | 3 | 0.04327  | 0.099204 | 0.69136  | 0.166166 |
| 185 | Bhrikuti   | 2 | 0.000748 | 0.989812 | 0.000001 | 0.009438 |
| 40  | NGRC 02556 | 2 | 0.000001 | 0.918793 | 0.000001 | 0.081204 |
| 137 | NGRC 04443 | 2 | 0.000001 | 0.88111  | 0.003491 | 0.115398 |
| 76  | NGRC 02602 | 4 | 0.000001 | 0.000001 | 0.017692 | 0.982305 |
| 142 | NGRC 04448 | 2 | 0.000001 | 0.999996 | 0.000001 | 0.000001 |
| 146 | NGRC 04452 | 3 | 0.430681 | 0.000001 | 0.569317 | 0.000001 |
| 228 | BW48141    | 2 | 0.000334 | 0.754422 | 0.245243 | 0.000001 |
| 161 | NGRC 04467 | 3 | 0.000001 | 0.000001 | 0.543876 | 0.456121 |
| 33  | NGRC 02548 | 3 | 0.000001 | 0.000001 | 0.999996 | 0.000001 |
| 32  | NGRC 02547 | 2 | 0.000001 | 0.975167 | 0.000001 | 0.024831 |
| 211 | BW45573    | 3 | 0.000001 | 0.000001 | 0.999996 | 0.000001 |
| 265 | BW49095    | 2 | 0.000001 | 0.989296 | 0.000001 | 0.010701 |
| 255 | BW49079    | 3 | 0.081509 | 0.030062 | 0.843805 | 0.044624 |
| 101 | NGRC 02632 | 4 | 0.038345 | 0.351566 | 0.000001 | 0.610087 |
| 234 | BW48151    | 2 | 0.000001 | 0.999996 | 0.000001 | 0.000001 |
| 217 | BW45587    | 3 | 0.000001 | 0.000001 | 0.999996 | 0.000001 |
| 297 | BW49217    | 4 | 0.000001 | 0.000001 | 0.000001 | 0.999996 |
| 307 | BW49342    | 2 | 0.000001 | 0.859869 | 0.000001 | 0.140128 |
| 59  | NGRC 02578 | 3 | 0.000001 | 0.000001 | 0.999996 | 0.000001 |
| 220 | BW48132    | 4 | 0.000001 | 0.184845 | 0.000001 | 0.815153 |
| 79  | NGRC 02605 | 3 | 0.000001 | 0.000001 | 0.999996 | 0.000001 |
| 6   | NGRC 00199 | 2 | 0.000001 | 0.999996 | 0.000001 | 0.000001 |
| 250 | BW49235    | 2 | 0.000001 | 0.999996 | 0.000001 | 0.000001 |
| 95  | NGRC 02623 | 3 | 0.392987 | 0.000001 | 0.60701  | 0.000001 |
| 216 | BW45593    | 3 | 0.000001 | 0.000001 | 0.999996 | 0.000001 |
| 50  | NGRC 02567 | 2 | 0.000001 | 0.999996 | 0.000001 | 0.000001 |
| 49  | NGRC 02566 | 2 | 0.000001 | 0.707248 | 0.000001 | 0.292749 |
| 254 | BW49078    | 3 | 0.000001 | 0.000001 | 0.999996 | 0.000001 |
| 241 | BW48161    | 2 | 0.000001 | 0.999996 | 0.000001 | 0.000001 |
| 52  | NGRC 02569 | 4 | 0.000001 | 0.000001 | 0.104724 | 0.895273 |
| 210 | BW45152    | 2 | 0.000001 | 0.977019 | 0.000001 | 0.022979 |
| 194 | WK1204     | 2 | 0.000001 | 0.999996 | 0.000001 | 0.000001 |
| 205 | BW45161    | 3 | 0.048471 | 0.145181 | 0.496952 | 0.309396 |
| 289 | BW49950    | 2 | 0.008288 | 0.92509  | 0.024079 | 0.042543 |
| 278 | BW49927    | 4 | 0.02998  | 0.401004 | 0.000001 | 0.569015 |
| 230 | BW48145    | 2 | 0.023046 | 0.798355 | 0.000001 | 0.178598 |
| 154 | NGRC 04460 | 2 | 0.000001 | 0.999996 | 0.000001 | 0.000001 |

|     |            |   |          |          |          |          |
|-----|------------|---|----------|----------|----------|----------|
| 37  | NGRC 02552 | 3 | 0.000001 | 0.000001 | 0.999996 | 0.000001 |
| 304 | BW49330    | 2 | 0.000001 | 0.999996 | 0.000001 | 0.000001 |
| 291 | BW49954    | 2 | 0.000001 | 0.778016 | 0.000001 | 0.221981 |
| 271 | BW49110    | 2 | 0.02132  | 0.948721 | 0.029958 | 0.000001 |
| 67  | NGRC 02587 | 3 | 0.000001 | 0.000001 | 0.999996 | 0.000001 |
| 74  | NGRC 02596 | 3 | 0.000001 | 0.000001 | 0.846913 | 0.153084 |
| 269 | BW49108    | 2 | 0.000001 | 0.817022 | 0.000001 | 0.182975 |
| 214 | BW45590    | 3 | 0.000001 | 0.000001 | 0.999996 | 0.000001 |
| 17  | NGRC 02457 | 2 | 0.000001 | 0.900959 | 0.090108 | 0.008932 |
| 318 | Pasteur    | 4 | 0.000001 | 0.000001 | 0.000001 | 0.999996 |
| 78  | NGRC 02604 | 3 | 0.000001 | 0.000001 | 0.999996 | 0.000001 |
| 34  | NGRC 02549 | 3 | 0.000001 | 0.000001 | 0.999996 | 0.000001 |
| 20  | NGRC 02460 | 2 | 0.000001 | 0.838974 | 0.000001 | 0.161023 |
| 231 | BW48148    | 2 | 0.000001 | 0.836216 | 0.000001 | 0.163782 |
