# Supplementary material for: Population structure of Nepali spring wheat (Triticum aestivum L.) germplasm
Source: PubMed Central journal article supplement (PMC7682013; doi:10.1186/s12870-020-02722-8), 2020-11-23
Supplement: 12870_2020_2722_MOESM4_ESM.pdf [file 12870_2020_2722_MOESM4_ESM.pdf]

**Manuscript title:**Population Structure of Nepali Spring Wheat (*Triticum aestivum* L.) Germplasm**Journal:**

BMC Plant Biology

**Authors:**\*Kamal Khadka<sup>1</sup>, Davoud Torkamaneh<sup>1,2,3</sup>, Mina Kaviani<sup>1</sup>, Francois Belzile<sup>2,3</sup>, Manish N. Raizada<sup>1</sup> and Alireza Navabi<sup>1</sup>**Affiliation:**\*<sup>1</sup> Department of Plant Agriculture, University of Guelph, Guelph, Ontario, Canada, N1G 2W1**Corresponding author email address:**[kamal.khadka011@gmail.com](mailto:kamal.khadka011@gmail.com)

**Additional file 4: Table S4.** The frequency of genotypes in the Nepali Wheat Diversity Panel as differentiated into different subpopulations based on Q-matrix obtained from fastSTRUCTURE

|                               | <b>Subpopulation<br/>1</b> | <b>Subpopulation<br/>2</b> | <b>Subpopulation<br/>3</b> | <b>Subpopulation<br/>4</b> | <b>Total</b>  |
|-------------------------------|----------------------------|----------------------------|----------------------------|----------------------------|---------------|
| <b>Landraces</b>              | 12 (0.07)                  | 62 (0.37)                  | 70 (0.42)                  | 22 (0.13)                  | 166<br>(1.00) |
| <b>CIMMYT lines</b>           | 8 (0.07)                   | 69 (0.60)                  | 25 (0.22)                  | 13 (0.11)                  | 115<br>(1.00) |
| <b>Released varieties</b>     | 2 (0.06)                   | 22 (0.65)                  | 4 (0.12)                   | 6(0.18)                    | 34 (1.00)     |
| <b>Canadian<br/>varieties</b> | 0                          | 1 (0.33)                   | 0                          | 2 (0.67)                   | 3 (1.00)      |

*Note: values in parentheses indicate the frequency within each seed source category*
